# Supplementary material for: Rice Serine Hydroxymethyltransferases: Evolution, Subcellular Localization, Function and Perspectives
Source: MDPI journal article supplement (doi:10.3390/plants13081116), 2024-04-16
Supplement: s1 [file s1]

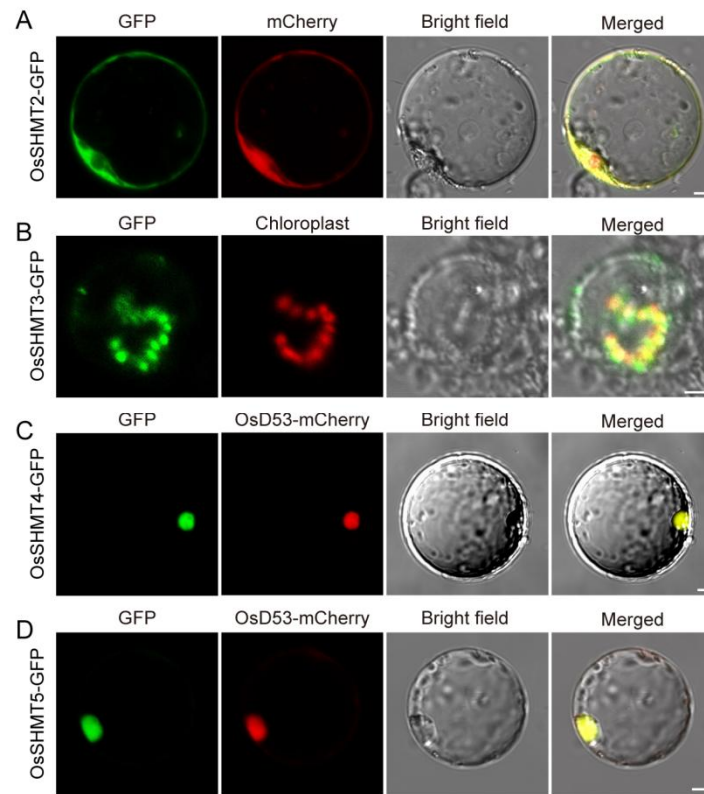

**Figure S1.** Subcellular localization of OsSHMTs in rice protoplast. (A-D) Confocal microscopic images showing the subcellular localization of OsSHMTs. mCherry serves as a cytoplasmic marker. Chloroplast autofluorescence is utilized as a marker for chloroplasts. OsD53-mCherry functions as a nuclear marker. Bars = 5  $\mu$ m.

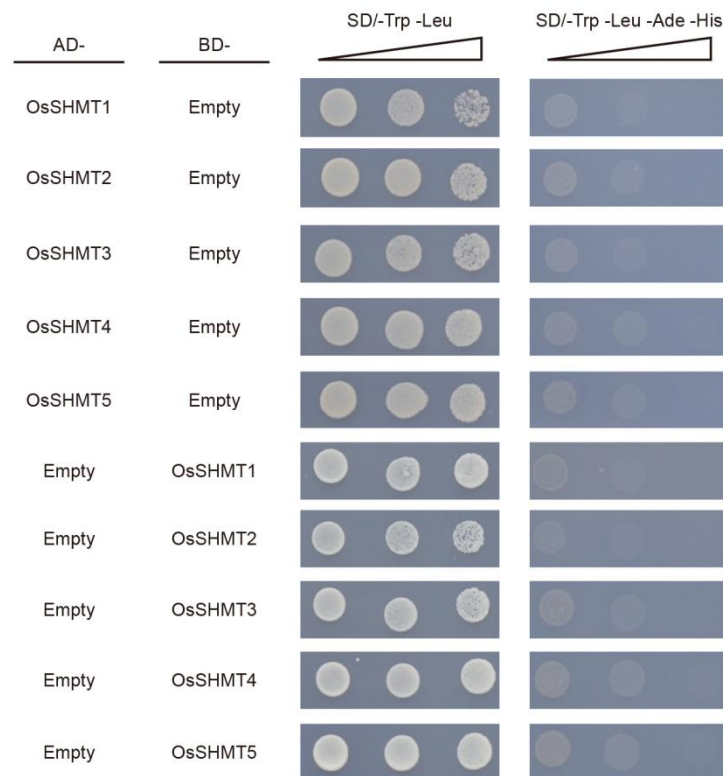

**Figure S2.** Negative controls for the Y2H assay. DDO, SD/-Trp/-Leu; QDO, SD/-Trp/-Leu/-Ade/-His. AD, fused with activation domain; BD, fused with binding domain.
