# Supplementary material for: Rice Serine Hydroxymethyltransferases: Evolution, Subcellular Localization, Function and Perspectives
Source: Plants (Basel). 2024 Apr 16;13(8):1116. doi: 10.3390/plants13081116 (PMC11053755; doi:10.3390/plants13081116)
Supplement: Supplementary file 1 [file plants-13-01116-s001.zip]

Archive with 10 entries (10 files):
- Supplemental Figure.pdf
- Table S1.xlsx
- Table S2.xlsx
- Table S3.xlsx
- Table S4.xlsx
- Table S5.xlsx
- Table S6.xlsx
- Table S7.xlsx
- Table S8.xlsx
- Table S9.xlsx
