# Supplementary material for: Rice Serine Hydroxymethyltransferases: Evolution, Subcellular Localization, Function and Perspectives
Source: Plants (Basel). 2024 Apr 16;13(8):1116. doi: 10.3390/plants13081116 (PMC11053755; doi:10.3390/plants13081116)
Supplement: Supplementary file 1 [file plants-13-01116-s001.zip › Table S1.xlsx]

## Sheet: Sheet1
Table S1 The characteristics of SHMT genes in rice
Gene Name	Gene ID	Location	Strand	Coding Sequence Length (bp)	Protein Length (aa)	Molecular Weight (KDa)	Isoelectric Point (pI)	Instability Index(II)	Grand average of hydropathicity (GRAVY)	Aliphatic index
OsSHMT1	LOC_Os03g52840.1	Chr3：30297668-30299667	+	1542	513	56.41	8.4	42.17	-0.27	82.18
OsSHMT2	LOC_Os11g26860.1	Chr11：15436709-15440045	+	1416	471	51.44	7.15	35.04	-0.217	83.14
OsSHMT3	LOC_Os12g22030.1	Chr12：212393254-12395253	-	1596	531	58.2	6.61	45.81	-0.303	78.87
OsSHMT4	LOC_Os01g65410.1	Chr1：37960872-37962871	+	1800	599	64.79	6.73	47.39	-0.376	74.53
OsSHMT5	LOC_Os05g35440.1	Chr5：21051393-21053392	-	1764	587	64.34	7.52	47.07	-0.345	77.02
