# Supplementary material for: Rice Serine Hydroxymethyltransferases: Evolution, Subcellular Localization, Function and Perspectives
Source: Plants (Basel). 2024 Apr 16;13(8):1116. doi: 10.3390/plants13081116 (PMC11053755; doi:10.3390/plants13081116)
Supplement: Supplementary file 1 [file plants-13-01116-s001.zip › Table S2.xlsx]

## Sheet: Sheet1
Table S2 SHMT genes used to construct the phylogenetic tree
Species	Gene ID	Gene names	Source
Arabidopsis thaliana	AT4G37930.1	AtSHMT1	Tair
	AT5G26780.3	AtSHMT2
	AT4G32520.1	AtSHMT3
	AT4G13930.1	AtSHMT4
	AT4G13890.1	AtSHMT5
	AT1G22020.1	AtSHMT6
	AT1G36370.1	AtSHMT7
Glycine max	GLYMA_18G150000	GmSHMT18m	Phytozome
	GLYMA_14G184500	GmSHMT14m
	GLYMA_13G222300	GmSHMT13ch
	GLYMA_12G170300	GmSHMT12n
	GLYMA_09G202000	GmSHMT09m
	GLYMA_08G108900	GmSHMT08c
	GLYMA_08G187800	GmSHMT08n
	GLYMA_08G274400	GmSHMT08m
	GLYMA_06G107800	GmSHMT06n
	GLYMA_05G152100	GmSHMT05c
	GLYMA_04G254300	GmSHMT04n
	GLYMA_02G217100	GmSHMT02m
Solanum lycopersicum	Solyc01g104000.3.1.ITAG3.2	SlSHMT1
	Solyc02g091560.3.1.ITAG3.2	SlSHMT2
	Solyc04g076790.3.1.ITAG3.2	SlSHMT3
	Solyc05g053810.3.1.ITAG3.2	SlSHMT4
	Solyc08g065490.3.1.ITAG3.2	SlSHMT5
	Solyc12g095930.2.1.ITAG3.2	SlSHMT6
	Solyc12g098490.2.1.ITAG3.2	SlSHMT7
Cucumis sativus	CsSHMT1 CsaV3_6G044790.1	CsSHMT1
	CsSHMT2 CsaV3_2G030460.1	CsSHMT2
	CsSHMT3 CsaV3_4G007440.1	CsSHMT3
	CsSHMT4 CsaV3_2G011710.1	CsSHMT4
	CsSHMT5 CsaV3_4G028640.1	CsSHMT5
	CsSHMT6 CsaV3_3G019180.1	CsSHMT6
Oryza sativa Japonica Group	LOC_Os03g52840.1	OsSHMT1
	LOC_Os11g26860.1	OsSHMT2
	LOC_Os12g22030.1	OsSHMT3
	LOC_Os01g65410.1	OsSHMT4
	LOC_Os05g35440.1	OsSHMT5
Zea mays	Zm00001eb030210_P001	ZmSHMT1
	Zm00001eb056550_P001	ZmSHMT2
	Zm00001eb146170_P002	ZmSHMT3
	Zm00001eb170020_P001	ZmSHMT4
	Zm00001eb345190_P001	ZmSHMT5
	Zm00001eb366470_P002	ZmSHMT6
