# Supplementary material for: Rice Serine Hydroxymethyltransferases: Evolution, Subcellular Localization, Function and Perspectives
Source: Plants (Basel). 2024 Apr 16;13(8):1116. doi: 10.3390/plants13081116 (PMC11053755; doi:10.3390/plants13081116)
Supplement: Supplementary file 1 [file plants-13-01116-s001.zip › Table S3.xlsx]

## Sheet: Number of SHMT genes
Table S3 Number of SHMT genes identified in selected species
Taxa	Species	Number	Group number
Eudicots	Arabidopsis thaliana	7	49
	Cucumis sativus	6
	Solanum lycopersicum	7
	Glycine max	12
	Populus trichocarpa	9
	Nymphaea colorata	8
Monocots	Zea mays	6	11
	Oryza sativa Japonica Group	5
Amborella	Amborella trichopoda	7	7
Chlorophyta	Chlamydomonas reinhardtii	3	3
Bryophyta	Physcomitrium patens	5	5
Chordata	Homo sapiens	2	2
Eumycophyta	Saccharomyces cerevisiae	2	2

## Sheet: Identifiers of SHMTs
Identifiers of SHMTs
AT1G22020.1_Atha
AT1G36370.1_Atha
AT4G13890.1_Atha
AT4G13930.1_Atha
AT4G32520.1_Atha
AT4G37930.1_Atha
AT5G26780.3_Atha
ENSP00000318868_Hsap
ENSP00000333667_Hsap
ERM98130_Atri
ERN10101_Atri
ERN12918_Atri
ERN12919_Atri
ERN16492_Atri
ERN18075_Atri
ERN20678_Atri
KGN48681_Csat
KGN53502_Csat
KGN54611_Csat
KGN57592_Csat
KGN61489_Csat
KGN62770_Csat
KRG99502_Gmax
KRH16896_Gmax
KRH21130_Gmax
KRH26369_Gmax
KRH39500_Gmax
KRH42751_Gmax
KRH44068_Gmax
KRH45493_Gmax
KRH53150_Gmax
KRH58850_Gmax
KRH64758_Gmax
KRH72501_Gmax
NC13G0029460.1:cds_Ncol
NC13G0195560.1:cds_Ncol
NC1G0067820.1:cds_Ncol
NC1G0105330.1:cds_Ncol
NC2G0002150.1:cds_Ncol
NC3G0228830.1:cds_Ncol
NC3G0231170.1:cds_Ncol
NC9G0169580.1:cds_Ncol
Os01t0874900-01_Osat
Os03t0738400-01_Osat
Os05t0429000-01_Osat
Os11t0455800-01_Osat
Os12t0409000-01_Osat
PNW71684_Crei
PNW79349_Crei
PNW82783_Crei
Potri.001G212000.4.v4.1_Ptri
Potri.001G320400.2.v4.1_Ptri
Potri.002G090200.1.v4.1_Ptri
Potri.002G109200.1.v4.1_Ptri
Potri.005G170800.1.v4.1_Ptri
Potri.006G232300.3.v4.1_Ptri
Potri.008G002900.16.v4.1_Ptri
Potri.010G254700.15.v4.1_Ptri
Potri.017G059300.1.v4.1_Ptri
Pp3c12_14950V3.1_Ppat
Pp3c13_1080V3.2_Ppat
Pp3c13_1100V3.2_Ppat
Pp3c4_11810V3.1_Ppat
Pp3c4_20570V3.2_Ppat
Solyc01g104000.3.1_Slyc
Solyc02g091560.3.1_Slyc
Solyc04g076790.3.1_Slyc
Solyc05g053810.3.1_Slyc
Solyc08g065490.3.1_Slyc
Solyc12g095930.2.1_Slyc
Solyc12g098490.2.1_Slyc
YBR263W_Scer
YLR058C_Scer
Zm00001eb030210_P001_Zmay
Zm00001eb056550_P001_Zmay
Zm00001eb146170_P002_Zmay
Zm00001eb170020_P001_Zmay
Zm00001eb345190_P001_Zmay
Zm00001eb366470_P002_Zmay
