# Supplementary material for: Rice Serine Hydroxymethyltransferases: Evolution, Subcellular Localization, Function and Perspectives
Source: Plants (Basel). 2024 Apr 16;13(8):1116. doi: 10.3390/plants13081116 (PMC11053755; doi:10.3390/plants13081116)
Supplement: Supplementary file 1 [file plants-13-01116-s001.zip › Table S4.xlsx]

## Sheet: Sheet1
Table S4 The details of conserved protein motifs
Motif	Motif sequence	Predictive function	Description	Length	E-value	Seq log
1	DKCGAILLCDMAHISGLVAAKEARNPFDYCDVVTTTTHKSLRGPRGGMIF	SHMT	Serine hydroxymethyltransferase pyridoxal-phosphate attachment site	50	1.4e-106
2	GIELIASENFTSRAVMEALGSHLTNKYSEGMPGARYYGGNZHIDEIERLC	DEHYDRIN_2	Dehydrins signature 2	50	4.4e-92
3	YDFEDRINFAVFPSLQGGPHNHHIAALAVALKQVATPEFKAYIKQVKANA	CAVEOLIN	Caveolins signature	50	3.5e-102
4	SIFFESLPYKVNPQTGYIDYDKLEEKAVDFRPKJIICGGSAYPRDWDYAR	SIGMA54_INTERACT_2	Sigma-54 interaction domain ATP-binding region B signature	50	9.9e-90
5	TGNKVEKVCEACHISLNKNPVYGDNSAISPGGVRIGTPAMTSRGLVEEDF	THF_DHG_CYH_2	Tetrahydrofolate dehydrogenase/cyclohydrolase signature 2	50	2.7e-82
6	LDPAAWGVNVQPYSGSPANFAVYTGLLLPHDRIMGLDLPSGGHLSHGYYT	PHYTOCHROME_1	Phytochrome chromophore attachment site signature	50	1.8e-105
7	TPLEEADPDVHDLMEREKRRQ	CKS_2	Cyclin-dependent kinases regulatory subunits signature 2	21	9e-19
8	FLHRAVTIALNVQKEHGKLQKDFLKGLENNKDIEELRNZVEKFATQFAMP	CALSEQUESTRIN_2	Calsequestrin signature 2	50	1.5e-50
9	LLSKGYKLVTGGTDNHLVLWDLRPLGL	SMALL_HYDR_PLANT_SEED	Small hydrophilic plant seed proteins signature	27	4.5e-36
10	YRKGLKPPKKGQPE	LIG_SH3_4	SH3 domain ligands	14	0.11
