# Supplementary material for: Rice Serine Hydroxymethyltransferases: Evolution, Subcellular Localization, Function and Perspectives
Source: Plants (Basel). 2024 Apr 16;13(8):1116. doi: 10.3390/plants13081116 (PMC11053755; doi:10.3390/plants13081116)
Supplement: Supplementary file 1 [file plants-13-01116-s001.zip › Table S5.xlsx]

## Sheet: cis-element
Table S5 The predictive cis-acting elements and bound transcription factors of OsSHMT genes
Gene name	Number	cis-acting element	Sequence	Category	Function
OsSHMT1	1	4cl-CMA1b	ATTCCGATAAACT	Light-responsive element	Light-responsive element
	2	AAGAA-motif	GAAAGAA/gGTAAAGAAA	Growth and development related	Growth and development related
	6	ABRE	TACGGTC/ACGTG/AACCCGG/CACGTG/CGCACGTGTC/GCAACGTGTC	Phytohormone-responsive	cis-acting element involved in the abscisic acid responsiveness
	1	ABRE3a	TACGTG	Phytohormone-responsive	Hormone-responsive
	1	ABRE4	CACGTA	Phytohormone-responsive	Hormone-responsive
	3	ARE	AAACCA	Stress-responsive element	cis-acting regulatory element essential for the anaerobic induction
	1	ATC-motif	TGCTATCCA/AGTAATCT	Light-responsive element	part of a conserved DNA module involved in light responsiveness
	1	CAT-box	GCCACT	Growth and development related	cis-acting regulatory element related to meristem expression
	3	GATA-motif	GATAGGG/AAGATAAGATT/AAGGATAAGG	Light-responsive element	part of a Light-responsive element
	5	G-Box	CACGTT/CACGTG	Light-responsive element	cis-acting regulatory element involved in light responsiveness
	1	GC-motif	CCCCCG	Stress-responsive element	enhancer-like element involved in anoxic specific inducibility
	2	GT1-motif	GGTTAAT/GGTTAA	Light-responsive element	Light-responsive element
	2	I-box	AAGATAAGGCT/gGATAAGGTG/cCATATCCAAT	Light-responsive element	part of a Light-responsive element
	1	LTR	CCGAAA	Stress-responsive element	cis-acting element involved in low-temperature responsiveness
	1	TATC-box	TATCCCA	Phytohormone-responsive	cis-acting element involved in gibberellin-responsiveness
	1	TCCC-motif	TCTCCCT	Light-responsive element	part of a Light-responsive element
	1	TGA-element	AACGAC	Phytohormone-responsive	auxin-responsive element
OsSHMT2	3	ABRE	TACGGTC/ACGTG/AACCCGG/CACGTG/CGCACGTGTC/GCAACGTGTC	Phytohormone-responsive	cis-acting element involved in the abscisic acid responsiveness
	1	Box 4	ATTAAT	Light-responsive element	part of a conserved DNA module involved in light responsiveness
	1	CCGTCC motif	CCGTCC	Growth and development related	Growth and development related
	1	CCGTCC-box	CCGTCC	Growth and development related	Growth and development related
	4	CGTCA-motif	CGTCA	Phytohormone-responsive	cis-acting regulatory element involved in the MeJA-responsiveness
	1	chs-Unit 1 m1	ACCTAACCCGC	Light-responsive element	part of a Light-responsive element
	2	DRE core	GCCGAC	Stress-responsive element	Stress-responsive element
	7	G-Box	CACGTT/CACGTG	Light-responsive element	cis-acting regulatory element involved in light responsiveness
	1	GT1-motif	GGTTAAT/GGTTAA	Light-responsive element	Light-responsive element
	1	GTGGC-motif	CATCGTGTGGC	Light-responsive element	part of a Light-responsive element
	1	I-box	AAGATAAGGCT/gGATAAGGTG/cCATATCCAAT	Light-responsive element	part of a Light-responsive element
	2	Sp1	GGGCGG	Light-responsive element	Light-responsive element
	7	STRE	AGGGG	Stress-responsive element	Stress-responsive element
	1	TCT-motif	TCTTAC	Light-responsive element	part of a Light-responsive element
	4	TGACG-motif	TGACG	Phytohormone-responsive	cis-acting regulatory element involved in the MeJA-responsiveness
	1	TGA-element	AACGAC	Phytohormone-responsive	auxin-responsive element
	2	WRE3	CCACCT	Stress-responsive element	Stress-responsive element
OsSHMT3	1	AAGAA-motif	GAAAGAA/gGTAAAGAAA	Growth and development related	Growth and development related
	2	ABRE	TACGGTC/ACGTG/AACCCGG/CACGTG/CGCACGTGTC/GCAACGTGTC	Phytohormone-responsive	cis-acting element involved in the abscisic acid responsiveness
	2	ARE	AAACCA	Stress-responsive element	cis-acting regulatory element essential for the anaerobic induction
	2	as-1	TGACG	Phytohormone-responsive	SA and oxidative responsiveness
	2	CGTCA-motif	CGTCA	Phytohormone-responsive	cis-acting regulatory element involved in the MeJA-responsiveness
	1	GARE-motif	TCTGTTG	Phytohormone-responsive	gibberellin-responsive element
	1	GATA-motif	GATAGGG/AAGATAAGATT/AAGGATAAGG	Light-responsive element	part of a Light-responsive element
	1	G-Box	CACGTT/CACGTG	Light-responsive element	cis-acting regulatory element involved in light responsiveness
	1	GCN4_motif	TGAGTCA	Growth and development related	cis-regulatory element involved in endosperm expression
	1	GT1-motif	GGTTAAT/GGTTAA	Light-responsive element	Light-responsive element
	2	MBS	CAACTG	Stress-responsive element	MYB binding site involved in drought-inducibility
	2	MRE	AACCTAA	Light-responsive element	MYB binding site involved in light responsiveness
	2	STRE	AGGGG	Stress-responsive element	Stress-responsive element
	1	TATC-box	TATCCCA	Phytohormone-responsive	cis-acting element involved in gibberellin-responsiveness
	1	TCA-element	CCATCTTTTT	Phytohormone-responsive	cis-acting element involved in salicylic acid responsiveness
	1	TCT-motif	TCTTAC	Light-responsive element	part of a Light-responsive element
	2	TGACG-motif	TGACG	Phytohormone-responsive	cis-acting regulatory element involved in the MeJA-responsiveness
OsSHMT4	1	AAGAA-motif	GAAAGAA/gGTAAAGAAA	Growth and development related	Light-responsive element
	5	ABRE	TACGGTC/ACGTG/AACCCGG/CACGTG/CGCACGTGTC/GCAACGTGTC	Phytohormone-responsive	cis-acting element involved in the abscisic acid responsiveness
	1	as-1	TGACG	Phytohormone-responsive	SA and oxidative responsiveness
	3	Box 4	ATTAAT	Light-responsive element	part of a conserved DNA module involved in light responsiveness
	1	CAT-box	GCCACT	Growth and development related	cis-acting regulatory element related to meristem expression
	1	CCGTCC motif	CCGTCC	Growth and development related	Growth and development related
	1	CCGTCC-box	CCGTCC	Growth and development related	Growth and development related
	1	CGTCA-motif	CGTCA	Phytohormone-responsive	cis-acting regulatory element involved in the MeJA-responsiveness
	2	DRE core	GCCGAC	Stress-responsive element	Stress-responsive element
	1	GA-motif	ATAGATAA	Light-responsive element	part of a Light-responsive element
	3	G-Box	CACGTT/CACGTG	Light-responsive element	cis-acting regulatory element involved in light responsiveness
	1	GC-motif	CCCCCG	Stress-responsive element	enhancer-like element involved in anoxic specific inducibility
	1	I-box	AAGATAAGGCT/gGATAAGGTG/cCATATCCAAT	Light-responsive element	part of a Light-responsive element
	10	STRE	AGGGG	Stress-responsive element	Stress-responsive element
	1	TCA-element	CCATCTTTTT	Phytohormone-responsive	cis-acting element involved in salicylic acid responsiveness
	1	TC-rich repeats	ATTCTCTAAC	Stress-responsive element	cis-acting element involved in defense and stress responsiveness
	1	TGACG-motif	TGACG	Phytohormone-responsive	cis-acting regulatory element involved in the MeJA-responsiveness
	2	WRE3	CCACCT	Stress-responsive element	Stress-responsive element
OsSHMT5	2	AAAC-motif	CAATCAAAACCT	Light-responsive element	Light-responsive element
	1	LAMP-element	CTTTATCA	Light-responsive element	part of a Light-responsive element
	1	RY-element	CATGCATG	Growth and development related	cis-acting regulatory element involved in seed-specific regulation
	2	STRE	AGGGG	Stress-responsive element	Stress-responsive element
	3	WRE3	CCACCT	Stress-responsive element	Stress-responsive element
	1	WUN-motif	AAATTACT	Stress-responsive element	WUN-motif is a dehydration-related element

## Sheet: TF-binding
Table S5 The predictive cis-acting elements and bound transcription factors of OsSHMT genes
Gene name	TF name	Family	Start	Stop	Strand	Score	p-value	q-value	Matched sequence
OsSHMT1	LOC_Os01g51610	B3	227	241	-	14.697	7.37e-06	0.146	AAGTACATGCAAAAT
	LOC_Os03g56950	bHLH	73	86	+	14.6053	6.98e-06	0.139	TGCAGTTCACGTGG
	LOC_Os05g03020	C2H2	1959	1977	+	15.6429	1.87e-06	0.00699	CCCCCGCCTCCACCACCAC
	LOC_Os02g10080	C3H	1592	1605	+	14.1818	3.12e-06	0.0588	AAAAAAAAAGGTAC
	LOC_Os02g10080	C3H	1835	1848	+	13.3636	9.6e-06	0.0904	AAAGGAAAAGGAAA
	LOC_Os02g47810	Dof	1830	1850	+	18.9545	6.34e-08	0.00115	AAATAAAAGGAAAAGGAAAAG
	LOC_Os02g47810	Dof	1824	1844	+	17.2273	4.75e-07	0.00429	AAATAAAAATAAAAGGAAAAG
	LOC_Os02g47810	Dof	1796	1816	-	14.9848	4.07e-06	0.0163	TTTTTAAATAAAAAGAAAAAA
	LOC_Os03g60630	Dof	1813	1833	+	21.8485	5.23e-09	8.71e-05	AAAAAAGAAGAAAATAAAAAT
	LOC_Os03g60630	Dof	1832	1852	+	17.9091	3.82e-07	0.00286	ATAAAAGGAAAAGGAAAAGAT
	LOC_Os03g60630	Dof	1788	1808	-	15.2121	3.47e-06	0.0116	TAAAAAGAAAAAAAATTCCAA
	LOC_Os03g60630	Dof	1838	1858	+	14.5	5.78e-06	0.016	GGAAAAGGAAAAGATTAAGCA
	LOC_Os07g13260	Dof	1828	1848	-	20.5303	2.69e-08	0.000459	TTTCCTTTTCCTTTTATTTTT
	LOC_Os07g13260	Dof	1823	1843	-	19.3333	9.46e-08	0.000747	TTTTCCTTTTATTTTTATTTT
	LOC_Os07g13260	Dof	1829	1849	-	19	1.32e-07	0.000747	TTTTCCTTTTCCTTTTATTTT
	LOC_Os07g13260	Dof	1822	1842	-	18.4091	2.31e-07	0.000985	TTTCCTTTTATTTTTATTTTC
	LOC_Os07g13260	Dof	1816	1836	-	17.5152	5.17e-07	0.00147	TTTATTTTTATTTTCTTCTTT
	LOC_Os07g13260	Dof	1661	1681	-	16.4848	1.23e-06	0.00262	CTTATTTTTATGTTTTTTTTT
	LOC_Os07g13260	Dof	1834	1854	-	16.0606	1.72e-06	0.00326	TAATCTTTTCCTTTTCCTTTT
	LOC_Os07g13260	Dof	1660	1680	-	15.7424	2.2e-06	0.00375	TTATTTTTATGTTTTTTTTTC
	LOC_Os07g13260	Dof	1810	1830	-	15.3636	2.93e-06	0.00417	TTTATTTTCTTCTTTTTTTAA
	LOC_Os07g13260	Dof	1815	1835	-	14.3333	6.15e-06	0.00749	TTATTTTTATTTTCTTCTTTT
	LOC_Os07g13260	Dof	1791	1811	+	13.8636	8.47e-06	0.00963	GAATTTTTTTTCTTTTTATTT
	LOC_Os01g07120	ERF	1961	1981	-	16.5493	1.2e-06	0.00215	GCGGGTGGTGGTGGAGGCGGG
	LOC_Os01g12440	ERF	1959	1979	+	18.6286	2.94e-07	0.000644	CCCCCGCCTCCACCACCACCC
	LOC_Os01g12440	ERF	1962	1982	+	15.2143	2.88e-06	0.00393	CCGCCTCCACCACCACCCGCC
	LOC_Os01g46870	ERF	1959	1979	+	18.6286	2.94e-07	0.000644	CCCCCGCCTCCACCACCACCC
	LOC_Os01g46870	ERF	1962	1982	+	15.2143	2.88e-06	0.00393	CCGCCTCCACCACCACCCGCC
	LOC_Os01g66270	ERF	1964	1978	-	14.3636	7.11e-06	0.0151	GGTGGTGGTGGAGGC
	LOC_Os01g66270	ERF	1967	1981	-	14.0303	8.96e-06	0.0151	GCGGGTGGTGGTGGA
	LOC_Os02g43820	ERF	1962	1976	+	16.0152	1.97e-06	0.00569	CCGCCTCCACCACCA
	LOC_Os02g55380	ERF	1961	1979	-	14.697	4.99e-06	0.00703	GGGTGGTGGTGGAGGCGGG
	LOC_Os02g55380	ERF	1964	1982	-	14.1364	7.16e-06	0.00884	GGCGGGTGGTGGTGGAGGC
	LOC_Os02g55380	ERF	1958	1976	-	13.6061	9.98e-06	0.0104	TGGTGGTGGAGGCGGGGGG
	LOC_Os03g07830	ERF	1965	1975	+	14.1212	8.96e-06	0.0254	CCTCCACCACC
	LOC_Os03g09170	ERF	1962	1976	+	18.2273	3.56e-07	0.00105	CCGCCTCCACCACCA
	LOC_Os03g09170	ERF	1965	1979	+	15.8636	2.32e-06	0.00319	CCTCCACCACCACCC
	LOC_Os03g15660	ERF	1959	1978	+	14.5	7.65e-06	0.0151	CCCCCGCCTCCACCACCACC
	LOC_Os04g32790	ERF	1958	1978	+	14.6515	5.03e-06	0.00966	CCCCCCGCCTCCACCACCACC
	LOC_Os04g46240	ERF	1962	1976	+	16.0152	1.97e-06	0.00569	CCGCCTCCACCACCA
	LOC_Os09g13940	ERF	1962	1976	+	14.0606	8.07e-06	0.0145	CCGCCTCCACCACCA
	LOC_Os11g13840	ERF	1960	1979	+	16.3485	1.19e-06	0.00167	CCCCGCCTCCACCACCACCC
	LOC_Os02g22020	G2-like	249	259	-	15.3636	2.79e-07	0.00514	GGAATCTTCTA
	LOC_Os02g47190	G2-like	249	262	-	14.7424	5.73e-06	0.107	GTAGGAATCTTCTA
	LOC_Os03g20900	G2-like	249	262	-	14.3788	6.63e-06	0.121	GTAGGAATCTTCTA
	LOC_Os06g48534	GATA	1859	1877	-	14.3684	9.87e-07	0.0191	CATCAGCATCACCAACCTC
	LOC_Os01g07480	LBD	1958	1978	+	13.4242	8.06e-06	0.0105	CCCCCCGCCTCCACCACCACC
	LOC_Os04g51000	LFY	679	697	+	13	9.4e-06	0.0868	TACGAACTGGTGGGCAGTG
	LOC_Os04g51000	LFY	679	697	-	13	9.4e-06	0.0868	CACTGCCCACCAGTTCGTA
	LOC_Os01g66030	MIKC_MADS	1813	1826	+	15.6515	2.36e-06	0.0226	AAAAAAGAAGAAAA
	LOC_Os02g41510	MYB	1313	1333	-	16.2576	7.16e-07	0.00653	TTTCAAGATCGCCACCAACCC
	LOC_Os02g41510	MYB	1860	1880	-	14.9545	3.14e-06	0.0143	ACGCATCAGCATCACCAACCT
	LOC_Os02g46780	MYB	1858	1872	+	14.5	6.86e-06	0.0655	AGAGGTTGGTGATGC
	LOC_Os04g43680	MYB	1313	1333	-	16.2576	7.16e-07	0.00657	TTTCAAGATCGCCACCAACCC
	LOC_Os04g43680	MYB	1860	1880	-	14.9545	3.14e-06	0.0144	ACGCATCAGCATCACCAACCT
	LOC_Os04g50770	MYB	1310	1330	-	16.0455	2.14e-06	0.0129	CAAGATCGCCACCAACCCAAA
	LOC_Os04g50770	MYB	1857	1877	-	15.803	2.64e-06	0.0129	CATCAGCATCACCAACCTCTG
	LOC_Os01g09640	MYB_related	963	977	-	14.1515	8.88e-06	0.0792	TATATTATCCACATG
	LOC_Os01g51154	MYB_related	56	65	+	11.3939	3.54e-06	0.0335	TACCCTAGCT
	LOC_Os10g41200	MYB_related	965	979	-	15.5758	2.65e-06	0.0241	AATATATTATCCACA
	LOC_Os06g44860	SBP	212	227	-	14.7778	2.57e-06	0.0435	TATTATGTACACTATA
	LOC_Os02g43300	Trihelix	849	864	-	15.8939	1.41e-06	0.0246	AAGGTAAAAATTAAAC
OsSHMT2	LOC_Os06g04010	BBR-BPC	330	350	-	4.48684	9.27e-06	0.167	ATAACTTTCTCTCTACGTATA
	LOC_Os03g51910	bHLH	559	579	+	15.9868	2.19e-06	0.0433	AGTAAGAACCACGTGATTTCA
	LOC_Os01g64020	bZIP	1570	1580	-	14.7424	6.2e-06	0.122	GATGACGTCGT
	LOC_Os02g10860	bZIP	1569	1583	-	14.8333	5.76e-06	0.114	GTCGATGACGTCGTT
	LOC_Os04g54474	bZIP	1571	1581	+	15.3333	3.63e-06	0.0722	CGACGTCATCG
	LOC_Os09g31390	bZIP	1569	1583	-	15.7879	2.79e-06	0.0555	GTCGATGACGTCGTT
	LOC_Os05g03020	C2H2	1225	1243	+	16.8254	8.49e-07	0.00664	CCCTCCTCTCCTCCTCCGC
	LOC_Os05g03020	C2H2	1866	1884	-	14.8254	3.16e-06	0.00986	CCTTCTCCTCCAGCTTCTC
	LOC_Os10g28330	C2H2	586	597	-	12.0686	8.56e-06	0.168	TTTTTTTTTTCG
	LOC_Os01g64590	Dof	820	830	+	13.8939	4.92e-06	0.0538	CATAAAGTAAA
	LOC_Os02g47810	Dof	584	604	+	14.8636	4.51e-06	0.0163	CTCGAAAAAAAAAAGAAGAAA
	LOC_Os03g60630	Dof	780	800	+	17.5758	5.15e-07	0.00286	TTAAAAGAAGAAAAAAAAACG
	LOC_Os07g13260	Dof	778	798	-	15.4242	2.8e-06	0.00417	TTTTTTTTTCTTCTTTTAATT
	LOC_Os07g13260	Dof	779	799	-	14.5606	5.25e-06	0.00688	GTTTTTTTTTCTTCTTTTAAT
	LOC_Os01g07120	ERF	1335	1355	-	23.9437	2.3e-09	1.93e-05	GGCGGCGGCGGCGGCGGCTGC
	LOC_Os01g07120	ERF	1297	1317	-	23.338	4.35e-09	1.93e-05	GGCGGCGGTGGTTGCGGCGGC
	LOC_Os01g07120	ERF	1294	1314	-	22.169	1.38e-08	4.53e-05	GGCGGTGGTTGCGGCGGCGAG
	LOC_Os01g07120	ERF	1338	1358	-	19.9859	9.41e-08	0.000232	CATGGCGGCGGCGGCGGCGGC
	LOC_Os01g07120	ERF	1344	1364	-	16.169	1.54e-06	0.00254	GGAGTCCATGGCGGCGGCGGC
	LOC_Os01g07120	ERF	1341	1361	-	15.4789	2.41e-06	0.00365	GTCCATGGCGGCGGCGGCGGC
	LOC_Os01g12440	ERF	1336	1356	+	27.2857	3.38e-11	6.66e-07	CAGCCGCCGCCGCCGCCGCCA
	LOC_Os01g12440	ERF	1333	1353	+	25.8	2.76e-10	2.73e-06	CCGCAGCCGCCGCCGCCGCCG
	LOC_Os01g12440	ERF	1295	1315	+	23.8	2.96e-09	1.95e-05	TCGCCGCCGCAACCACCGCCG
	LOC_Os01g12440	ERF	1339	1359	+	23.3857	4.59e-09	2.26e-05	CCGCCGCCGCCGCCGCCATGG
	LOC_Os01g12440	ERF	1345	1365	+	22.6143	9.99e-09	3.94e-05	CCGCCGCCGCCATGGACTCCG
	LOC_Os01g12440	ERF	1342	1362	+	20.9143	4.74e-08	0.000156	CCGCCGCCGCCGCCATGGACT
	LOC_Os01g12440	ERF	1428	1448	-	18.6571	2.88e-07	0.000644	CCGCTGCCGCCGCTTCTCCCG
	LOC_Os01g12440	ERF	1292	1312	+	17.0429	8.98e-07	0.00161	GCCTCGCCGCCGCAACCACCG
	LOC_Os01g12440	ERF	1304	1324	+	15.0714	3.13e-06	0.00393	CAACCACCGCCGCCTCGCCGC
	LOC_Os01g12440	ERF	1327	1347	+	13.8429	6.37e-06	0.00662	CATCACCCGCAGCCGCCGCCG
	LOC_Os01g12440	ERF	1301	1321	+	13.7429	6.74e-06	0.00664	CCGCAACCACCGCCGCCTCGC
	LOC_Os01g46870	ERF	1336	1356	+	27.2857	3.38e-11	6.66e-07	CAGCCGCCGCCGCCGCCGCCA
	LOC_Os01g46870	ERF	1333	1353	+	25.8	2.76e-10	2.73e-06	CCGCAGCCGCCGCCGCCGCCG
	LOC_Os01g46870	ERF	1295	1315	+	23.8	2.96e-09	1.95e-05	TCGCCGCCGCAACCACCGCCG
	LOC_Os01g46870	ERF	1339	1359	+	23.3857	4.59e-09	2.26e-05	CCGCCGCCGCCGCCGCCATGG
	LOC_Os01g46870	ERF	1345	1365	+	22.6143	9.99e-09	3.94e-05	CCGCCGCCGCCATGGACTCCG
	LOC_Os01g46870	ERF	1342	1362	+	20.9143	4.74e-08	0.000156	CCGCCGCCGCCGCCATGGACT
	LOC_Os01g46870	ERF	1428	1448	-	18.6571	2.88e-07	0.000644	CCGCTGCCGCCGCTTCTCCCG
	LOC_Os01g46870	ERF	1292	1312	+	17.0429	8.98e-07	0.00161	GCCTCGCCGCCGCAACCACCG
	LOC_Os01g46870	ERF	1304	1324	+	15.0714	3.13e-06	0.00393	CAACCACCGCCGCCTCGCCGC
	LOC_Os01g46870	ERF	1327	1347	+	13.8429	6.37e-06	0.00662	CATCACCCGCAGCCGCCGCCG
	LOC_Os01g46870	ERF	1301	1321	+	13.7429	6.74e-06	0.00664	CCGCAACCACCGCCGCCTCGC
	LOC_Os01g66270	ERF	1338	1352	-	19.5303	5.56e-08	0.000551	GGCGGCGGCGGCGGC
	LOC_Os01g66270	ERF	1341	1355	-	19.5303	5.56e-08	0.000551	GGCGGCGGCGGCGGC
	LOC_Os01g66270	ERF	1306	1320	-	16.2727	1.61e-06	0.00532	CGAGGCGGCGGTGGT
	LOC_Os01g66270	ERF	1335	1349	-	14	9.14e-06	0.0151	GGCGGCGGCGGCTGC
	LOC_Os01g66270	ERF	1174	1188	-	13.8788	9.91e-06	0.0151	GTTGGTGGTGGTGGG
	LOC_Os02g42585	ERF	1336	1355	-	20.6364	1.28e-09	2.54e-05	GGCGGCGGCGGCGGCGGCTG
	LOC_Os02g42585	ERF	1333	1352	-	20	4.69e-09	4.63e-05	GGCGGCGGCGGCGGCTGCGG
	LOC_Os02g42585	ERF	1298	1317	-	19.5	1.18e-08	7.75e-05	GGCGGCGGTGGTTGCGGCGG
	LOC_Os02g42585	ERF	1295	1314	-	19.197	1.98e-08	8.22e-05	GGCGGTGGTTGCGGCGGCGA
	LOC_Os02g42585	ERF	1330	1349	-	18.7121	4.36e-08	0.000143	GGCGGCGGCGGCTGCGGGTG
	LOC_Os02g42585	ERF	1477	1496	-	15.6515	2.08e-06	0.00541	GACGGCGAAGGAGGTGAAGT
	LOC_Os02g42585	ERF	1327	1346	-	15.4848	2.46e-06	0.00541	GGCGGCGGCTGCGGGTGATG
	LOC_Os02g42585	ERF	1675	1694	-	14.1515	8.28e-06	0.0149	GGCGGCGAAGTTGGCCGGCG
	LOC_Os02g43820	ERF	1339	1353	+	23.6667	1.27e-09	1.67e-05	CCGCCGCCGCCGCCG
	LOC_Os02g43820	ERF	1342	1356	+	23.6212	1.69e-09	1.67e-05	CCGCCGCCGCCGCCA
	LOC_Os02g43820	ERF	1336	1350	+	21.3636	1.95e-08	0.000129	CAGCCGCCGCCGCCG
	LOC_Os02g43820	ERF	1333	1347	+	20.3939	4.45e-08	0.00022	CCGCAGCCGCCGCCG
	LOC_Os02g43820	ERF	1304	1318	+	17.8788	4.8e-07	0.0019	CAACCACCGCCGCCT
	LOC_Os02g43820	ERF	1345	1359	+	15.2273	3.32e-06	0.00588	CCGCCGCCGCCATGG
	LOC_Os02g43820	ERF	1434	1448	-	15.1212	3.56e-06	0.00588	CCGCTGCCGCCGCTT
	LOC_Os02g43820	ERF	1301	1315	+	14.9697	3.97e-06	0.00605	CCGCAACCACCGCCG
	LOC_Os02g43820	ERF	1483	1497	+	14.5	5.38e-06	0.00761	CCTCCTTCGCCGTCA
	LOC_Os02g43820	ERF	1330	1344	+	13.9697	7.49e-06	0.00927	CACCCGCAGCCGCCG
	LOC_Os02g45420	ERF	1963	1977	-	15.3182	2.93e-06	0.0581	CCTTGTCGGCGACGG
	LOC_Os02g55380	ERF	1338	1356	-	23.0455	1.21e-09	2.4e-05	TGGCGGCGGCGGCGGCGGC
	LOC_Os02g55380	ERF	1294	1312	-	20.5152	3.49e-08	0.00034	CGGTGGTTGCGGCGGCGAG
	LOC_Os02g55380	ERF	1335	1353	-	20.1515	5.16e-08	0.00034	CGGCGGCGGCGGCGGCTGC
	LOC_Os02g55380	ERF	1341	1359	-	18.8182	1.97e-07	0.000975	CCATGGCGGCGGCGGCGGC
	LOC_Os02g55380	ERF	1332	1350	-	17.3788	6.95e-07	0.00208	CGGCGGCGGCGGCTGCGGG
	LOC_Os02g55380	ERF	1428	1446	+	15.4242	3.05e-06	0.00558	CGGGAGAAGCGGCGGCAGC
	LOC_Os02g55380	ERF	1344	1362	-	15.3939	3.11e-06	0.00558	AGTCCATGGCGGCGGCGGC
	LOC_Os02g55380	ERF	1306	1324	-	14.3788	6.13e-06	0.00807	GCGGCGAGGCGGCGGTGGT
	LOC_Os03g07830	ERF	1339	1349	+	18.1364	5.68e-07	0.00376	CCGCCGCCGCC
	LOC_Os03g07830	ERF	1342	1352	+	18.1364	5.68e-07	0.00376	CCGCCGCCGCC
	LOC_Os03g07830	ERF	1345	1355	+	18.1364	5.68e-07	0.00376	CCGCCGCCGCC
	LOC_Os03g07830	ERF	1307	1317	+	17.0758	1.15e-06	0.00571	CCACCGCCGCC
	LOC_Os03g07830	ERF	1304	1314	+	15.2879	4.52e-06	0.0174	CAACCACCGCC
	LOC_Os03g07830	ERF	1336	1346	+	15.1212	5.26e-06	0.0174	CAGCCGCCGCC
	LOC_Os03g09170	ERF	1342	1356	+	22.7273	8.92e-10	1.77e-05	CCGCCGCCGCCGCCA
	LOC_Os03g09170	ERF	1339	1353	+	21.5455	8.97e-09	8.88e-05	CCGCCGCCGCCGCCG
	LOC_Os03g09170	ERF	1336	1350	+	19.0909	1.52e-07	0.001	CAGCCGCCGCCGCCG
	LOC_Os03g09170	ERF	1304	1318	+	18.5606	2.6e-07	0.00105	CAACCACCGCCGCCT
	LOC_Os03g09170	ERF	1333	1347	+	17.9091	4.72e-07	0.00117	CCGCAGCCGCCGCCG
	LOC_Os03g09170	ERF	1301	1315	+	16.5455	1.4e-06	0.00251	CCGCAACCACCGCCG
	LOC_Os03g09170	ERF	1483	1497	+	15.803	2.42e-06	0.00319	CCTCCTTCGCCGTCA
	LOC_Os03g09170	ERF	1434	1448	-	14.7879	4.88e-06	0.00568	CCGCTGCCGCCGCTT
	LOC_Os03g09170	ERF	1172	1186	+	14.2273	7.04e-06	0.00734	CACCCACCACCACCA
	LOC_Os03g09170	ERF	1175	1189	+	13.7727	9.33e-06	0.00923	CCACCACCACCAACC
	LOC_Os03g15660	ERF	1295	1314	+	19.6364	3.39e-08	0.000669	TCGCCGCCGCAACCACCGCC
	LOC_Os03g15660	ERF	1298	1317	+	17.4091	5.76e-07	0.00398	CCGCCGCAACCACCGCCGCC
	LOC_Os03g15660	ERF	1336	1355	+	17.0909	8.07e-07	0.00398	CAGCCGCCGCCGCCGCCGCC
	LOC_Os03g15660	ERF	1333	1352	+	16.8485	1.03e-06	0.00407	CCGCAGCCGCCGCCGCCGCC
	LOC_Os03g15660	ERF	1330	1349	+	15.2424	4.36e-06	0.00955	CACCCGCAGCCGCCGCCGCC
	LOC_Os03g64260	ERF	1340	1354	+	21.9848	7.93e-10	1.57e-05	CGCCGCCGCCGCCGC
	LOC_Os03g64260	ERF	1337	1351	+	20.3939	1.95e-08	0.00013	AGCCGCCGCCGCCGC
	LOC_Os03g64260	ERF	1343	1357	+	20.3182	2.23e-08	0.00013	CGCCGCCGCCGCCAT
	LOC_Os03g64260	ERF	1334	1348	+	20.2273	2.62e-08	0.00013	CGCAGCCGCCGCCGC
	LOC_Os03g64260	ERF	1305	1319	+	17.5	7.42e-07	0.00245	AACCACCGCCGCCTC
	LOC_Os03g64260	ERF	1331	1345	+	17.5	7.42e-07	0.00245	ACCCGCAGCCGCCGC
	LOC_Os03g64260	ERF	1302	1316	+	16	2.54e-06	0.00719	CGCAACCACCGCCGC
	LOC_Os03g64260	ERF	1290	1304	+	14.4848	6.96e-06	0.0172	CCGCCTCGCCGCCGC
	LOC_Os04g32790	ERF	1335	1355	+	23.4697	9.22e-10	1.82e-05	GCAGCCGCCGCCGCCGCCGCC
	LOC_Os04g32790	ERF	1294	1314	+	22.5455	3.45e-09	3.41e-05	CTCGCCGCCGCAACCACCGCC
	LOC_Os04g32790	ERF	1338	1358	+	21.4242	1.42e-08	9.34e-05	GCCGCCGCCGCCGCCGCCATG
	LOC_Os04g32790	ERF	1341	1361	+	21.1667	1.92e-08	9.47e-05	GCCGCCGCCGCCGCCATGGAC
	LOC_Os04g32790	ERF	1344	1364	+	20.5	4.01e-08	0.000159	GCCGCCGCCGCCATGGACTCC
	LOC_Os04g32790	ERF	1332	1352	+	18.303	3.32e-07	0.00109	CCCGCAGCCGCCGCCGCCGCC
	LOC_Os04g32790	ERF	1426	1446	-	16.6667	1.24e-06	0.00351	GCTGCCGCCGCTTCTCCCGCT
	LOC_Os04g32790	ERF	1347	1367	+	14.5606	5.33e-06	0.00966	GCCGCCGCCATGGACTCCGTC
	LOC_Os04g32790	ERF	1291	1311	+	14.5455	5.39e-06	0.00966	CGCCTCGCCGCCGCAACCACC
	LOC_Os04g32790	ERF	1485	1505	+	14.0909	7.16e-06	0.0104	TCCTTCGCCGTCATGGAGGCC
	LOC_Os04g46240	ERF	1339	1353	+	23.6667	1.27e-09	1.67e-05	CCGCCGCCGCCGCCG
	LOC_Os04g46240	ERF	1342	1356	+	23.6212	1.69e-09	1.67e-05	CCGCCGCCGCCGCCA
	LOC_Os04g46240	ERF	1336	1350	+	21.3636	1.95e-08	0.000129	CAGCCGCCGCCGCCG
	LOC_Os04g46240	ERF	1333	1347	+	20.3939	4.45e-08	0.00022	CCGCAGCCGCCGCCG
	LOC_Os04g46240	ERF	1304	1318	+	17.8788	4.8e-07	0.0019	CAACCACCGCCGCCT
	LOC_Os04g46240	ERF	1345	1359	+	15.2273	3.32e-06	0.00588	CCGCCGCCGCCATGG
	LOC_Os04g46240	ERF	1434	1448	-	15.1212	3.56e-06	0.00588	CCGCTGCCGCCGCTT
	LOC_Os04g46240	ERF	1301	1315	+	14.9697	3.97e-06	0.00604	CCGCAACCACCGCCG
	LOC_Os04g46240	ERF	1483	1497	+	14.5	5.38e-06	0.0076	CCTCCTTCGCCGTCA
	LOC_Os04g46240	ERF	1330	1344	+	13.9697	7.49e-06	0.00927	CACCCGCAGCCGCCG
	LOC_Os04g48350	ERF	1964	1977	+	14.6364	3.72e-06	0.0369	CGTCGCCGACAAGG
	LOC_Os04g57340	ERF	1342	1356	-	22.4545	8.92e-10	1.77e-05	TGGCGGCGGCGGCGG
	LOC_Os04g57340	ERF	1339	1353	-	21.5909	3.69e-09	3.66e-05	CGGCGGCGGCGGCGG
	LOC_Os04g57340	ERF	1336	1350	-	20.2424	3.2e-08	0.000211	CGGCGGCGGCGGCTG
	LOC_Os04g57340	ERF	1333	1347	-	17.8182	5.15e-07	0.00256	CGGCGGCGGCTGCGG
	LOC_Os04g57340	ERF	1304	1318	-	17.3788	7.45e-07	0.00296	AGGCGGCGGTGGTTG
	LOC_Os04g57340	ERF	1483	1497	-	16.303	1.77e-06	0.00586	TGACGGCGAAGGAGG
	LOC_Os04g57340	ERF	1292	1306	-	15.6364	2.88e-06	0.00816	TTGCGGCGGCGAGGC
	LOC_Os04g57340	ERF	1434	1448	+	15.1667	3.97e-06	0.00985	AAGCGGCGGCAGCGG
	LOC_Os04g57340	ERF	1330	1344	-	14.3939	6.59e-06	0.0145	CGGCGGCTGCGGGTG
	LOC_Os05g28350	ERF	1340	1349	+	13.2889	7.54e-06	0.0323	CGCCGCCGCC
	LOC_Os05g28350	ERF	1343	1352	+	13.2889	7.54e-06	0.0323	CGCCGCCGCC
	LOC_Os05g28350	ERF	1346	1355	+	13.2889	7.54e-06	0.0323	CGCCGCCGCC
	LOC_Os05g28350	ERF	1438	1447	-	13.2333	8.12e-06	0.0323	CGCTGCCGCC
	LOC_Os05g28350	ERF	1917	1926	-	13.2333	8.12e-06	0.0323	CGCTGCCGCC
	LOC_Os05g41760	ERF	1296	1303	+	14.9512	9.36e-06	0.0466	CGCCGCCG
	LOC_Os05g41760	ERF	1340	1347	+	14.9512	9.36e-06	0.0466	CGCCGCCG
	LOC_Os05g41760	ERF	1343	1350	+	14.9512	9.36e-06	0.0466	CGCCGCCG
	LOC_Os05g41760	ERF	1346	1353	+	14.9512	9.36e-06	0.0466	CGCCGCCG
	LOC_Os06g09390	ERF	1336	1356	-	21.1061	1.57e-08	0.000155	TGGCGGCGGCGGCGGCGGCTG
	LOC_Os06g09390	ERF	1295	1315	-	21.0758	1.64e-08	0.000155	CGGCGGTGGTTGCGGCGGCGA
	LOC_Os06g09390	ERF	1333	1353	-	20.803	2.35e-08	0.000155	CGGCGGCGGCGGCGGCTGCGG
	LOC_Os06g09390	ERF	1339	1359	-	20.1818	5.06e-08	0.00025	CCATGGCGGCGGCGGCGGCGG
	LOC_Os06g09390	ERF	1342	1362	-	19.3485	1.28e-07	0.000506	AGTCCATGGCGGCGGCGGCGG
	LOC_Os06g09390	ERF	1345	1365	-	19.0455	1.75e-07	0.000577	CGGAGTCCATGGCGGCGGCGG
	LOC_Os06g09390	ERF	1428	1448	+	17	1.1e-06	0.00275	CGGGAGAAGCGGCGGCAGCGG
	LOC_Os06g09390	ERF	1292	1312	-	16.9848	1.11e-06	0.00275	CGGTGGTTGCGGCGGCGAGGC
	LOC_Os07g10410	ERF	1339	1353	+	18.2727	2.93e-08	0.000582	CCGCCGCCGCCGCCG
	LOC_Os07g10410	ERF	1342	1356	+	17.1818	2.2e-07	0.00213	CCGCCGCCGCCGCCA
	LOC_Os07g10410	ERF	1336	1350	+	16.9394	3.21e-07	0.00213	CAGCCGCCGCCGCCG
	LOC_Os07g10410	ERF	1333	1347	+	16.1061	1.02e-06	0.00505	CCGCAGCCGCCGCCG
	LOC_Os07g10410	ERF	1483	1497	+	15.4394	2.29e-06	0.00909	CCTCCTTCGCCGTCA
	LOC_Os07g10410	ERF	1304	1318	+	15.0303	3.52e-06	0.0116	CAACCACCGCCGCCT
	LOC_Os07g10410	ERF	1437	1451	-	14.0758	8.97e-06	0.0254	GCTCCGCTGCCGCCG
	LOC_Os07g42510	ERF	1840	1847	+	13.9636	9.36e-06	0.186	GCGCCGCC
	LOC_Os07g47330	ERF	1342	1356	+	21.7727	4.2e-10	8.33e-06	CCGCCGCCGCCGCCA
	LOC_Os07g47330	ERF	1339	1353	+	21.2879	1.74e-09	1.72e-05	CCGCCGCCGCCGCCG
	LOC_Os07g47330	ERF	1336	1350	+	19.5152	6.07e-08	0.000401	CAGCCGCCGCCGCCG
	LOC_Os07g47330	ERF	1333	1347	+	17.7727	5.23e-07	0.00259	CCGCAGCCGCCGCCG
	LOC_Os07g47330	ERF	1304	1318	+	16.8788	1.21e-06	0.00434	CAACCACCGCCGCCT
	LOC_Os07g47330	ERF	1434	1448	-	16.7879	1.31e-06	0.00434	CCGCTGCCGCCGCTT
	LOC_Os07g47330	ERF	1483	1497	+	15.6212	3.3e-06	0.00935	CCTCCTTCGCCGTCA
	LOC_Os07g47330	ERF	1292	1306	+	15.1364	4.62e-06	0.0114	GCCTCGCCGCCGCAA
	LOC_Os07g47330	ERF	1913	1927	-	14.2576	8.16e-06	0.018	GCGCTGCCGCCGCAG
	LOC_Os08g45110	ERF	1338	1352	-	19.5606	6.03e-08	0.000596	GGCGGCGGCGGCGGC
	LOC_Os08g45110	ERF	1341	1355	-	19.5606	6.03e-08	0.000596	GGCGGCGGCGGCGGC
	LOC_Os08g45110	ERF	1306	1320	-	16.7879	1.1e-06	0.00363	CGAGGCGGCGGTGGT
	LOC_Os08g45110	ERF	1429	1443	+	15.6212	2.87e-06	0.0081	GGGAGAAGCGGCGGC
	LOC_Os08g45110	ERF	1344	1358	-	14.2727	7.54e-06	0.0186	CATGGCGGCGGCGGC
	LOC_Os09g13940	ERF	1342	1356	+	22.9242	4.2e-10	7.85e-06	CCGCCGCCGCCGCCA
	LOC_Os09g13940	ERF	1339	1353	+	22.6061	7.93e-10	7.85e-06	CCGCCGCCGCCGCCG
	LOC_Os09g13940	ERF	1336	1350	+	20.4697	2.69e-08	0.000178	CAGCCGCCGCCGCCG
	LOC_Os09g13940	ERF	1333	1347	+	19.5455	8.85e-08	0.000439	CCGCAGCCGCCGCCG
	LOC_Os09g13940	ERF	1304	1318	+	17.0758	9.58e-07	0.00368	CAACCACCGCCGCCT
	LOC_Os09g13940	ERF	1434	1448	-	16.8788	1.11e-06	0.00368	CCGCTGCCGCCGCTT
	LOC_Os09g13940	ERF	1292	1306	+	15.9697	2.24e-06	0.00635	GCCTCGCCGCCGCAA
	LOC_Os09g13940	ERF	1913	1927	-	15.1212	4.07e-06	0.0101	GCGCTGCCGCCGCAG
	LOC_Os09g13940	ERF	1345	1359	+	14.4545	6.29e-06	0.0139	CCGCCGCCGCCATGG
	LOC_Os09g13940	ERF	1483	1497	+	14.0606	8.07e-06	0.0145	CCTCCTTCGCCGTCA
	LOC_Os09g28440	ERF	1296	1310	-	17.5606	4.53e-07	0.00899	GTGGTTGCGGCGGCG
	LOC_Os09g28440	ERF	1346	1360	-	16.1061	2e-06	0.0199	TCCATGGCGGCGGCG
	LOC_Os09g28440	ERF	1340	1354	-	14.3485	8.33e-06	0.0551	GCGGCGGCGGCGGCG
	LOC_Os09g39810	ERF	1348	1357	+	13.007	6.57e-07	0.0131	CCGCCGCCAT
	LOC_Os09g39810	ERF	1840	1849	+	12.8951	2.48e-06	0.0241	GCGCCGCCAC
	LOC_Os09g39810	ERF	1339	1348	+	12.4895	6.06e-06	0.0241	CCGCCGCCGC
	LOC_Os09g39810	ERF	1342	1351	+	12.4895	6.06e-06	0.0241	CCGCCGCCGC
	LOC_Os09g39810	ERF	1345	1354	+	12.4895	6.06e-06	0.0241	CCGCCGCCGC
	LOC_Os11g13840	ERF	1337	1356	+	24.4545	2.14e-10	4.22e-06	AGCCGCCGCCGCCGCCGCCA
	LOC_Os11g13840	ERF	1334	1353	+	22.9848	1.7e-09	1.45e-05	CGCAGCCGCCGCCGCCGCCG
	LOC_Os11g13840	ERF	1296	1315	+	22.7727	2.21e-09	1.45e-05	CGCCGCCGCAACCACCGCCG
	LOC_Os11g13840	ERF	1299	1318	+	20.8485	2.02e-08	6.65e-05	CGCCGCAACCACCGCCGCCT
	LOC_Os11g13840	ERF	1331	1350	+	20.2424	3.78e-08	0.000106	ACCCGCAGCCGCCGCCGCCG
	LOC_Os11g13840	ERF	1478	1497	+	19.9697	4.96e-08	0.000122	CTTCACCTCCTTCGCCGTCA
	LOC_Os11g13840	ERF	1293	1312	+	16.7424	8.7e-07	0.00132	CCTCGCCGCCGCAACCACCG
	LOC_Os11g13840	ERF	1340	1359	+	14.9242	3.47e-06	0.00456	CGCCGCCGCCGCCGCCATGG
	LOC_Os11g13840	ERF	1284	1303	+	14.6364	4.27e-06	0.00526	CTCCTCCCGCCTCGCCGCCG
	LOC_Os11g13840	ERF	1167	1186	+	14.3939	5.07e-06	0.00587	ACCCGCACCCACCACCACCA
	LOC_Os11g13840	ERF	1349	1368	+	13.7576	7.86e-06	0.00861	CGCCGCCATGGACTCCGTCG
	LOC_Os12g01490	G2-like	688	698	-	14.4394	4.54e-06	0.0308	AAAAGAATGTA
	LOC_Os01g07480	LBD	1297	1317	+	25.5758	3.39e-10	4.91e-06	GCCGCCGCAACCACCGCCGCC
	LOC_Os01g07480	LBD	1335	1355	+	25.2576	4.98e-10	4.91e-06	GCAGCCGCCGCCGCCGCCGCC
	LOC_Os01g07480	LBD	1338	1358	+	22.9848	5.9e-09	3.88e-05	GCCGCCGCCGCCGCCGCCATG
	LOC_Os01g07480	LBD	1332	1352	+	22.5152	9.32e-09	4.6e-05	CCCGCAGCCGCCGCCGCCGCC
	LOC_Os01g07480	LBD	1329	1349	+	20.3182	6.63e-08	0.000262	TCACCCGCAGCCGCCGCCGCC
	LOC_Os01g07480	LBD	1294	1314	+	16.5152	1.15e-06	0.00379	CTCGCCGCCGCAACCACCGCC
	LOC_Os01g07480	LBD	1300	1320	+	15.2727	2.61e-06	0.00735	GCCGCAACCACCGCCGCCTCG
	LOC_Os01g07480	LBD	1435	1455	-	14.197	5.09e-06	0.00913	TGCCGCTCCGCTGCCGCCGCT
	LOC_Os01g07480	LBD	1320	1340	+	14	5.73e-06	0.00942	GCCGCAGCATCACCCGCAGCC
	LOC_Os01g07480	LBD	1432	1452	-	13.3788	8.27e-06	0.0105	CGCTCCGCTGCCGCCGCTTCT
	LOC_Os01g60960	LBD	1299	1315	-	20.3939	1.91e-08	0.000379	CGGCGGTGGTTGCGGCG
	LOC_Os01g60960	LBD	1340	1356	-	16.7121	1.04e-06	0.0103	TGGCGGCGGCGGCGGCG
	LOC_Os01g60960	LBD	1337	1353	-	14.9091	4.43e-06	0.0293	CGGCGGCGGCGGCGGCT
	LOC_Os01g66590	LBD	1295	1315	+	24.6667	3.2e-10	6.32e-06	TCGCCGCCGCAACCACCGCCG
	LOC_Os01g66590	LBD	1336	1356	+	22.3788	6.31e-09	4.45e-05	CAGCCGCCGCCGCCGCCGCCA
	LOC_Os01g66590	LBD	1333	1353	+	22.3182	6.75e-09	4.45e-05	CCGCAGCCGCCGCCGCCGCCG
	LOC_Os01g66590	LBD	1327	1347	+	16.5303	1.22e-06	0.00604	CATCACCCGCAGCCGCCGCCG
	LOC_Os01g66590	LBD	1330	1350	+	15.303	2.89e-06	0.0113	CACCCGCAGCCGCCGCCGCCG
	LOC_Os01g66590	LBD	1345	1365	+	15.0455	3.44e-06	0.0113	CCGCCGCCGCCATGGACTCCG
	LOC_Os01g66590	LBD	1348	1368	+	14.5909	4.64e-06	0.013	CCGCCGCCATGGACTCCGTCG
	LOC_Os01g66590	LBD	1425	1445	-	14.2727	5.69e-06	0.013	CTGCCGCCGCTTCTCCCGCTC
	LOC_Os03g14270	LBD	1427	1445	-	14	6.64e-06	0.132	CTGCCGCCGCTTCTCCCGC
	LOC_Os01g66030	MIKC_MADS	592	605	+	15.6515	2.36e-06	0.0226	AAAAAAGAAGAAAA
	LOC_Os02g41510	MYB	1170	1190	+	15.6667	1.45e-06	0.00885	CGCACCCACCACCACCAACCT
	LOC_Os04g43680	MYB	1170	1190	+	15.6667	1.45e-06	0.0089	CGCACCCACCACCACCAACCT
	LOC_Os04g50770	MYB	1173	1193	+	17.4545	5.43e-07	0.0106	ACCCACCACCACCAACCTCCC
	LOC_Os05g04820	MYB	1170	1184	+	15.2121	1.31e-06	0.0255	CGCACCCACCACCAC
	LOC_Os05g04820	MYB	1180	1194	+	14.0909	6.89e-06	0.0334	ACCACCAACCTCCCA
	LOC_Os08g33940	MYB	1175	1189	+	14.5303	5.67e-06	0.0349	CCACCACCACCAACC
	LOC_Os11g03440	MYB	374	392	+	14.6667	6.15e-06	0.0573	TCATATCAACTACTTCCTC
	LOC_Os12g03150	MYB	374	392	+	14.6667	6.15e-06	0.0591	TCATATCAACTACTTCCTC
	LOC_Os03g51690	TALE	1280	1299	+	18.8846	5.49e-08	0.00108	CCCTCTCCTCCCGCCTCGCC
	LOC_Os03g51690	TALE	1610	1629	+	15.5897	2.28e-06	0.0149	CGCCCTCGCCGCGTTCCGCC
	LOC_Os03g51690	TALE	1285	1304	+	14.6538	5.18e-06	0.0254	TCCTCCCGCCTCGCCGCCGC
	LOC_Os03g51690	TALE	1275	1294	+	14.3205	6.81e-06	0.0267	CACTCCCCTCTCCTCCCGCC
OsSHMT3	LOC_Os01g55580	CPP	1484	1493	-	13.57	9.87e-06	0.179	AATTTGAATA
	LOC_Os01g64590	Dof	1927	1937	-	13.7576	5.87e-06	0.0538	GATAAAGTAAA
	LOC_Os12g01490	G2-like	155	165	-	14.4394	4.54e-06	0.0308	AAAAGAATGTA
	LOC_Os08g33940	MYB	605	619	+	14.7121	4.9e-06	0.0349	CCACCACCACCCACA
	LOC_Os02g46030	MYB_related	79	92	-	15.0455	6.4e-06	0.0565	TTTAAAATATCTAT
	LOC_Os02g46030	MYB_related	1349	1362	-	15.0455	6.4e-06	0.0565	AAAAAAATATCAAT
	LOC_Os01g47560	WRKY	551	563	+	14.7424	5.46e-06	0.106	GACATTGACTTTT
	LOC_Os02g08440	WRKY	551	565	+	15.0303	4.01e-06	0.0782	GACATTGACTTTTGT
	LOC_Os05g09020	WRKY	553	565	+	15.8939	3.11e-06	0.058	CATTGACTTTTGT
	LOC_Os11g29870	WRKY	551	563	-	14.7121	7e-06	0.135	AAAAGTCAATGTC
OsSHMT4	LOC_Os06g47150	ARF	453	473	+	9.66265	1.12e-06	0.0199	TTTTTTTTTTTGGCAAAGAAT
	LOC_Os06g47150	ARF	500	520	-	4.40964	6.05e-06	0.0539	CTTACATTTTTGGGAAAAATT
	LOC_Os04g46670	C2H2	136	145	-	12.8739	5.34e-06	0.106	ACCAGCTGGG
	LOC_Os05g03020	C2H2	1701	1719	+	18.4524	2.67e-07	0.005	CCCCCCCCTTCCCCTCCTC
	LOC_Os05g03020	C2H2	1707	1725	+	16.4921	1.06e-06	0.00664	CCTTCCCCTCCTCACCTTC
	LOC_Os05g03020	C2H2	1704	1722	+	15.9127	1.56e-06	0.00699	CCCCCTTCCCCTCCTCACC
	LOC_Os05g03020	C2H2	1698	1716	+	14.5397	3.78e-06	0.0101	CCCCCCCCCCCTTCCCCTC
	LOC_Os05g03020	C2H2	1917	1935	-	13.2381	8.34e-06	0.0195	CCACCACCACCACCACCAC
	LOC_Os02g47810	Dof	1374	1394	-	15.5	2.59e-06	0.0156	GACAAGAAAAAAAAGTTAGTA
	LOC_Os02g47810	Dof	945	965	+	14.4848	6.18e-06	0.0186	AAAAAAAAAAAAAAGATTAGC
	LOC_Os02g49440	Dof	1373	1386	-	14.8485	3.65e-06	0.0668	AAAAAAGTTAGTAA
	LOC_Os03g60630	Dof	1366	1386	-	15.4242	2.97e-06	0.0116	AAAAAAGTTAGTAAAAATGAA
	LOC_Os07g13260	Dof	943	963	-	17.7121	4.35e-07	0.00147	TAATCTTTTTTTTTTTTTTGC
	LOC_Os07g13260	Dof	1376	1396	+	16.6515	1.07e-06	0.00261	CTAACTTTTTTTTCTTGTCAT
	LOC_Os07g13260	Dof	944	964	-	13.697	9.47e-06	0.0101	CTAATCTTTTTTTTTTTTTTG
	LOC_Os03g20780	EIL	206	220	-	14.03	6.24e-06	0.116	ATCCAGATTCATAGT
	LOC_Os03g20790	EIL	206	220	-	14.03	6.24e-06	0.113	ATCCAGATTCATAGT
	LOC_Os01g07120	ERF	1916	1936	+	26.7606	7.18e-11	1.42e-06	GGTGGTGGTGGTGGTGGTGGT
	LOC_Os01g07120	ERF	1913	1933	+	23.3803	4.17e-09	1.93e-05	AACGGTGGTGGTGGTGGTGGT
	LOC_Os01g07120	ERF	1919	1939	+	23.2254	4.89e-09	1.93e-05	GGTGGTGGTGGTGGTGGTGAG
	LOC_Os01g07120	ERF	1910	1930	+	21.7183	2.1e-08	5.91e-05	GGTAACGGTGGTGGTGGTGGT
	LOC_Os01g07120	ERF	1907	1927	+	18.2676	3.58e-07	0.000785	GGGGGTAACGGTGGTGGTGGT
	LOC_Os01g07120	ERF	1904	1924	+	17.3662	6.86e-07	0.00135	TGAGGGGGTAACGGTGGTGGT
	LOC_Os01g12440	ERF	1915	1935	-	19.7143	1.28e-07	0.00036	CCACCACCACCACCACCACCG
	LOC_Os01g12440	ERF	1918	1938	-	17.3	7.55e-07	0.00149	TCACCACCACCACCACCACCA
	LOC_Os01g12440	ERF	1909	1929	-	15.6571	2.19e-06	0.00361	CCACCACCACCACCGTTACCC
	LOC_Os01g12440	ERF	1912	1932	-	15.2	2.9e-06	0.00393	CCACCACCACCACCACCGTTA
	LOC_Os01g12440	ERF	1830	1850	+	15.0429	3.19e-06	0.00393	TCGCCTCCGCCGACGTCGACC
	LOC_Os01g12440	ERF	1827	1847	+	14.2714	5e-06	0.00557	CCATCGCCTCCGCCGACGTCG
	LOC_Os01g12440	ERF	1906	1926	-	14.2429	5.08e-06	0.00557	CCACCACCACCGTTACCCCCT
	LOC_Os01g46870	ERF	1915	1935	-	19.7143	1.28e-07	0.00036	CCACCACCACCACCACCACCG
	LOC_Os01g46870	ERF	1918	1938	-	17.3	7.55e-07	0.00149	TCACCACCACCACCACCACCA
	LOC_Os01g46870	ERF	1909	1929	-	15.6571	2.19e-06	0.00361	CCACCACCACCACCGTTACCC
	LOC_Os01g46870	ERF	1912	1932	-	15.2	2.9e-06	0.00393	CCACCACCACCACCACCGTTA
	LOC_Os01g46870	ERF	1830	1850	+	15.0429	3.19e-06	0.00393	TCGCCTCCGCCGACGTCGACC
	LOC_Os01g46870	ERF	1827	1847	+	14.2714	5e-06	0.00557	CCATCGCCTCCGCCGACGTCG
	LOC_Os01g46870	ERF	1906	1926	-	14.2429	5.08e-06	0.00557	CCACCACCACCGTTACCCCCT
	LOC_Os01g66270	ERF	1916	1930	+	17.9242	3.45e-07	0.00137	GGTGGTGGTGGTGGT
	LOC_Os01g66270	ERF	1919	1933	+	17.9242	3.45e-07	0.00137	GGTGGTGGTGGTGGT
	LOC_Os01g66270	ERF	1922	1936	+	17.9242	3.45e-07	0.00137	GGTGGTGGTGGTGGT
	LOC_Os01g66270	ERF	1925	1939	+	14.4242	6.79e-06	0.0151	GGTGGTGGTGGTGAG
	LOC_Os01g66270	ERF	1835	1849	-	14.2121	7.89e-06	0.0151	GTCGACGTCGGCGGA
	LOC_Os01g66270	ERF	1913	1927	+	13.9848	9.23e-06	0.0151	AACGGTGGTGGTGGT
	LOC_Os02g42585	ERF	1824	1843	-	19.1667	2.08e-08	8.22e-05	GTCGGCGGAGGCGATGGGAG
	LOC_Os02g42585	ERF	1913	1932	+	15.4848	2.46e-06	0.00541	AACGGTGGTGGTGGTGGTGG
	LOC_Os02g42585	ERF	1498	1517	+	15.1212	3.51e-06	0.00693	GTCGGCGGCAGGTGCGTCGA
	LOC_Os02g43820	ERF	1827	1841	+	15.9848	2.01e-06	0.00569	CCATCGCCTCCGCCG
	LOC_Os02g43820	ERF	1915	1929	-	15.4848	2.82e-06	0.00577	CCACCACCACCACCG
	LOC_Os02g43820	ERF	1918	1932	-	15.4394	2.91e-06	0.00577	CCACCACCACCACCA
	LOC_Os02g43820	ERF	1921	1935	-	15.4394	2.91e-06	0.00577	CCACCACCACCACCA
	LOC_Os02g43820	ERF	1833	1847	+	14.2273	6.37e-06	0.00841	CCTCCGCCGACGTCG
	LOC_Os02g43820	ERF	1912	1926	-	13.8333	8.13e-06	0.00948	CCACCACCACCGTTA
	LOC_Os02g43820	ERF	1924	1938	-	13.5758	9.53e-06	0.0105	TCACCACCACCACCA
	LOC_Os02g45420	ERF	1494	1508	+	14.5606	6.92e-06	0.0687	ACGTGTCGGCGGCAG
	LOC_Os02g55380	ERF	1915	1933	+	18.2273	3.36e-07	0.00133	CGGTGGTGGTGGTGGTGGT
	LOC_Os02g55380	ERF	1918	1936	+	17.303	7.39e-07	0.00208	TGGTGGTGGTGGTGGTGGT
	LOC_Os02g55380	ERF	1906	1924	+	16.4545	1.44e-06	0.00355	AGGGGGTAACGGTGGTGGT
	LOC_Os02g55380	ERF	1829	1847	-	15.8939	2.18e-06	0.00477	CGACGTCGGCGGAGGCGAT
	LOC_Os02g55380	ERF	1832	1850	-	15.1061	3.79e-06	0.00624	GGTCGACGTCGGCGGAGGC
	LOC_Os02g55380	ERF	1921	1939	+	14.697	4.99e-06	0.00703	TGGTGGTGGTGGTGGTGAG
	LOC_Os02g55380	ERF	1912	1930	+	13.7121	9.35e-06	0.0104	TAACGGTGGTGGTGGTGGT
	LOC_Os02g55380	ERF	1909	1927	+	13.6818	9.52e-06	0.0104	GGGTAACGGTGGTGGTGGT
	LOC_Os03g09170	ERF	1918	1932	-	18.1667	3.73e-07	0.00105	CCACCACCACCACCA
	LOC_Os03g09170	ERF	1921	1935	-	18.1667	3.73e-07	0.00105	CCACCACCACCACCA
	LOC_Os03g09170	ERF	1915	1929	-	16.9848	9.97e-07	0.00219	CCACCACCACCACCG
	LOC_Os03g09170	ERF	1830	1844	+	16.5909	1.34e-06	0.00251	TCGCCTCCGCCGACG
	LOC_Os03g09170	ERF	1924	1938	-	16.2576	1.73e-06	0.00285	TCACCACCACCACCA
	LOC_Os03g09170	ERF	1912	1926	-	16.0455	2.03e-06	0.00309	CCACCACCACCGTTA
	LOC_Os03g09170	ERF	1927	1941	-	15.1061	3.93e-06	0.00486	CCCTCACCACCACCA
	LOC_Os03g09170	ERF	1827	1841	+	14.2576	6.92e-06	0.00734	CCATCGCCTCCGCCG
	LOC_Os03g15660	ERF	1824	1843	+	17.1515	7.58e-07	0.00398	CTCCCATCGCCTCCGCCGAC
	LOC_Os03g15660	ERF	1913	1932	-	16.3788	1.63e-06	0.00535	CCACCACCACCACCACCGTT
	LOC_Os03g15660	ERF	1916	1935	-	16.0303	2.24e-06	0.00631	CCACCACCACCACCACCACC
	LOC_Os03g15660	ERF	1919	1938	-	15.2576	4.3e-06	0.00955	TCACCACCACCACCACCACC
	LOC_Os04g32790	ERF	1829	1849	+	15.7576	2.4e-06	0.00592	ATCGCCTCCGCCGACGTCGAC
	LOC_Os04g32790	ERF	1832	1852	+	14.4091	5.87e-06	0.00966	GCCTCCGCCGACGTCGACCGC
	LOC_Os04g32790	ERF	1916	1936	-	14.0455	7.37e-06	0.0104	ACCACCACCACCACCACCACC
	LOC_Os04g46240	ERF	1827	1841	+	15.9848	2.01e-06	0.00569	CCATCGCCTCCGCCG
	LOC_Os04g46240	ERF	1915	1929	-	15.4848	2.82e-06	0.00577	CCACCACCACCACCG
	LOC_Os04g46240	ERF	1918	1932	-	15.4394	2.91e-06	0.00577	CCACCACCACCACCA
	LOC_Os04g46240	ERF	1921	1935	-	15.4394	2.91e-06	0.00577	CCACCACCACCACCA
	LOC_Os04g46240	ERF	1833	1847	+	14.2273	6.37e-06	0.0084	CCTCCGCCGACGTCG
	LOC_Os04g46240	ERF	1912	1926	-	13.8333	8.13e-06	0.00947	CCACCACCACCGTTA
	LOC_Os04g46240	ERF	1924	1938	-	13.5758	9.53e-06	0.0105	TCACCACCACCACCA
	LOC_Os04g48350	ERF	1834	1847	+	14.8636	2.6e-06	0.0369	CTCCGCCGACGTCG
	LOC_Os04g57340	ERF	1830	1844	-	13.9091	8.88e-06	0.0176	CGTCGGCGGAGGCGA
	LOC_Os08g45110	ERF	1916	1930	+	17.1212	8.12e-07	0.00321	GGTGGTGGTGGTGGT
	LOC_Os08g45110	ERF	1919	1933	+	17.1212	8.12e-07	0.00321	GGTGGTGGTGGTGGT
	LOC_Os08g45110	ERF	1922	1936	+	17.1212	8.12e-07	0.00321	GGTGGTGGTGGTGGT
	LOC_Os10g41130	ERF	1494	1508	+	14.3636	9.52e-06	0.189	ACGTGTCGGCGGCAG
	LOC_Os11g13840	ERF	1918	1937	-	22.5152	3.06e-09	1.51e-05	CACCACCACCACCACCACCA
	LOC_Os11g13840	ERF	1915	1934	-	22.1515	4.73e-09	1.86e-05	CACCACCACCACCACCACCG
	LOC_Os11g13840	ERF	1912	1931	-	19.3333	9.17e-08	0.000183	CACCACCACCACCACCGTTA
	LOC_Os11g13840	ERF	1921	1940	-	19.3182	9.3e-08	0.000183	CCTCACCACCACCACCACCA
	LOC_Os11g13840	ERF	1825	1844	+	18.3485	2.25e-07	0.000404	TCCCATCGCCTCCGCCGACG
	LOC_Os11g13840	ERF	1828	1847	+	17.8333	3.53e-07	0.000579	CATCGCCTCCGCCGACGTCG
	LOC_Os11g13840	ERF	1906	1925	-	13.4394	9.75e-06	0.0101	CACCACCACCGTTACCCCCT
	LOC_Os12g01490	G2-like	44	54	-	14.3333	4.94e-06	0.0308	AATAGAATTTT
	LOC_Os01g07480	LBD	1823	1843	+	15.0152	3.07e-06	0.00746	TCTCCCATCGCCTCCGCCGAC
	LOC_Os01g07480	LBD	1848	1868	+	14.8182	3.47e-06	0.00746	ACCGCCTCCTTTGCTGCTGTC
	LOC_Os01g07480	LBD	1829	1849	+	14.6818	3.78e-06	0.00746	ATCGCCTCCGCCGACGTCGAC
	LOC_Os01g07480	LBD	1913	1933	-	13.7273	6.74e-06	0.0102	ACCACCACCACCACCACCGTT
	LOC_Os01g07480	LBD	1916	1936	-	13.3333	8.5e-06	0.0105	ACCACCACCACCACCACCACC
	LOC_Os01g66590	LBD	1821	1841	+	14.2121	5.92e-06	0.013	TCTCTCCCATCGCCTCCGCCG
	LOC_Os01g66590	LBD	1827	1847	+	13.9091	7.16e-06	0.0141	CCATCGCCTCCGCCGACGTCG
	LOC_Os01g10504	MIKC_MADS	450	468	+	14.5352	5.21e-06	0.0946	CTGTTTTTTTTTTTGGCAA
	LOC_Os03g54160	MIKC_MADS	508	519	+	15.0238	2.88e-06	0.0492	CCAAAAATGTAA
	LOC_Os02g41510	MYB	1606	1626	+	17.1061	2.26e-07	0.00412	CACACCACCACCCACCAACCC
	LOC_Os02g46780	MYB	1614	1628	-	14.8939	4.5e-06	0.0655	GAGGGTTGGTGGGTG
	LOC_Os04g43680	MYB	1606	1626	+	17.1061	2.26e-07	0.00415	CACACCACCACCCACCAACCC
	LOC_Os04g50770	MYB	1609	1629	+	16.2879	1.73e-06	0.0129	ACCACCACCCACCAACCCTCC
	LOC_Os05g04820	MYB	1612	1626	+	14.5909	3.5e-06	0.0334	ACCACCCACCAACCC
	LOC_Os05g04820	MYB	1616	1630	+	14.2121	5.87e-06	0.0334	CCCACCAACCCTCCC
	LOC_Os06g06740	MYB	64	78	-	17.1061	2.5e-07	0.00462	GAATTGTAACGTAAA
	LOC_Os08g33940	MYB	1611	1625	+	15.0606	3.55e-06	0.0349	CACCACCCACCAACC
	LOC_Os08g33940	MYB	1607	1621	+	13.8939	9.51e-06	0.0438	ACACCACCACCCACC
	LOC_Os01g51154	MYB_related	1950	1959	-	11.4343	8.32e-07	0.0158	AACCCTAGCC
	LOC_Os03g51690	TALE	1698	1717	+	16.3205	1.13e-06	0.0111	CCCCCCCCCCCTTCCCCTCC
	LOC_Os05g09020	WRKY	1006	1018	-	14.0758	9.97e-06	0.0931	ATTTGACTTATTT
OsSHMT5	LOC_Os03g42430	B3	1641	1661	+	9.16901	1.24e-06	0.0232	CTTTTTTTTTTGTTGAGAAAA
	LOC_Os03g42430	B3	944	964	+	2.46479	8.68e-06	0.0811	ACCATTTTTTTGTAGGGAAAA
	LOC_Os10g02584	BBR-BPC	1126	1149	+	8.18182	3.28e-06	0.0588	GAGAGAGTGAGATTAAGTGTCAGT
	LOC_Os11g03440	MYB	491	509	-	15.5758	2.73e-06	0.0508	CATTTTCAACCACTTGAGT
	LOC_Os12g03150	MYB	491	509	-	15.5758	2.73e-06	0.0524	CATTTTCAACCACTTGAGT
	LOC_Os01g09640	MYB_related	1307	1321	-	16.7727	1.03e-06	0.0185	TACTTTATCCATATA
	LOC_Os10g41200	MYB_related	1309	1323	-	16.9091	5.13e-07	0.00935	ATTACTTTATCCATA
	LOC_Os02g51280	TCP	564	583	-	7.65556	6.48e-06	0.128	ATGGTTATTGTGGGGTCCAC
	LOC_Os04g44440	TCP	563	576	+	15.3939	4.05e-06	0.0804	GGTGGACCCCACAA
	LOC_Os06g12230	TCP	562	574	+	16.5758	1.53e-06	0.0305	AGGTGGACCCCAC
