# Supplementary material for: Rice Serine Hydroxymethyltransferases: Evolution, Subcellular Localization, Function and Perspectives
Source: Plants (Basel). 2024 Apr 16;13(8):1116. doi: 10.3390/plants13081116 (PMC11053755; doi:10.3390/plants13081116)
Supplement: Supplementary file 1 [file plants-13-01116-s001.zip › Table S6.xlsx]

## Sheet: Sheet1
Table S6 Original expression data of OsSHMTs in tissues
	OsSHMT1	OsSHMT2	OsSHMT3	OsSHMT4	OsSHMT5
Seedling_Root_Rep1	18130.2	14588	2305.55	1387.61	581.688
Seedling_Root_Rep2	17080.8	15604.1	2155.65	1400.65	642.948
Seedling_Root_Rep3	19691.4	15779.6	2348.48	1649.06	517.493
RICE_CTRL	3863.97	3012.56	1409.21	1704.99	567.401
MatureLeaf_Rep1	22608.8	2228.68	2463	2172.92	1752.79
MatureLeaf_Rep2	24802.4	2400.09	2847.72	1721.39	1638.69
MatureLeaf_Rep3	21470.7	2912.45	1595.67	1928.42	1304.48
YoungLeaf_Rep1	5716.63	971.622	2011.85	1067.75	2129.15
YoungLeaf_Rep2	12550.6	1019.45	1792.85	1318.86	972.659
YoungLeaf_Rep3	10638.7	715.024	1472.73	1239.28	1241.3
SAM_Rep1	6271.86	3948.34	3315.77	1042.88	715.026
SAM_Rep2	6435.72	3545.95	3662.18	801.661	845.799
SAM_Rep3	7531.39	4046.98	2875.22	1076.01	786.397
YoungInflorescence_Rep1	5976.36	2107.49	1293.57	2680.11	912.257
YoungInflorescence_Rep2	6530.76	2269.4	1553.22	1873.32	925.592
YoungInflorescence_Rep3	4311.34	2014.23	1082.05	2508.8	1569.9
InflorescenceP2_Rep1	3839.24	2651.18	1556.1	1962.68	1318.04
InflorescenceP2_Rep2	4591.23	2210.62	1630.51	2173.62	1204.88
InflorescenceP2_Rep3	4206.76	2103.43	1552.04	2066.08	1400.07
InflorescenceP3_Rep1	4661.6	3431.13	1143.14	2462.7	819.982
InflorescenceP3_Rep2	3634.53	3700.95	1435.79	2094.71	818.486
InflorescenceP3_Rep3	3883.73	3260.17	969.369	2536.07	734.334
InflorescenceP4_Rep1	5284.11	3942.98	978.658	1918.89	541.931
InflorescenceP4_Rep2	5782.49	4734.24	1273.94	2148.16	653.961
InflorescenceP4_Rep3	5085.86	4603.34	1131.9	2339.87	1036.26
InflorescenceP5_Rep1	13716.8	6953.25	1240.54	1101.17	414.346
InflorescenceP5_Rep2	13667.4	5702.64	1154.64	970.98	411.711
InflorescenceP5_Rep3	13806.6	6556.08	1306.14	1330.7	464.183
InflorescenceP6_Rep1	10647.7	6239.3	1166.07	1850.91	942.26
InflorescenceP6_Rep2	9790.1	6422.28	1051.72	1970.75	857.098
InflorescenceP6_Rep3	10194.2	6513.5	1095.51	2153.78	884.446
Seed_S1_Rep1	11698.4	5573.31	1726.35	1667.87	757.893
Seed_S1_Rep2	11993.3	6160.08	1888.26	1897.15	861.552
Seed_S1_Rep3	10540.2	5675.34	2217.4	1662.47	714.213
Seed_S2_Rep1	10216.7	2020.34	2594.6	2549.37	1345.02
Seed_S2_Rep2	12284.9	2993.62	3332.61	1958.81	873.706
Seed_S2_Rep3	12619.3	3012.56	2699.69	1770.58	819.872
Seed_S3_Rep1	11348.8	2902.65	2087.48	3453.05	552.748
Seed_S3_Rep2	9867.95	3492.88	2438.28	4789.36	549.122
Seed_S3_Rep3	9227.8	2973.04	2432.95	4362.8	504.983
Seed_S4_Rep1	5277.37	2431.36	3226.54	3629.42	918.151
Seed_S4_Rep2	6763.72	2708.4	3365.07	3857.19	666.26
Seed_S4_Rep3	4211.52	2725.56	3024.6	4459.14	794.871
Seed_S5_Rep1	3136.84	2593.47	3665.08	2958.67	1107.95
Seed_S5_Rep2	3573.38	2627.55	3051.04	3465.29	1024.46
Seed_S5_Rep3	3063.68	2366.6	3418.84	3010.45	1240.17
