# Supplementary material for: Rice Serine Hydroxymethyltransferases: Evolution, Subcellular Localization, Function and Perspectives
Source: Plants (Basel). 2024 Apr 16;13(8):1116. doi: 10.3390/plants13081116 (PMC11053755; doi:10.3390/plants13081116)
Supplement: Supplementary file 1 [file plants-13-01116-s001.zip › Table S7.xlsx]

## Sheet: Sheet1
Table S7 Interacting Protein Function Annotation
GO function	Term ID	Term description	Matching proteins in network
			LOC_Os01g51410	LOC_Os06g40940	LOC_Os09g27420	LOC_Os08g10570	LOC_Os04g53230
Cellular component	GO:0005622	Intracellular anatomical structure	√	√	√	√	√
	GO:0005737	Cytoplasm	√	√	√	√	√
	GO:0005739	Mitochondrion	√	√			√
	GO:0005960	Glycine cleavage complex	√	√
	GO:0032991	Protein-containing complex	√	√
	GO:0043226	Organelle	√	√	√	√	√
	GO:0043227	Membrane-bounded organelle	√	√	√	√	√
	GO:0043229	Intracellular organelle	√	√	√	√	√
	GO:0043231	Intracellular membrane-bounded organelle	√	√	√	√	√
	GO:0110165	Cellular anatomical entity	√	√	√	√	√
	GO:1902494	Catalytic complex	√	√
	GO:1990204	Oxidoreductase complex	√	√
	GO:0005829	Cytosol				√
	GO:0009507	Chloroplast				√
	GO:0009526	Plastid envelope				√
	GO:0009532	Plastid stroma				√
	GO:0009536	Plastid				√
	GO:0009570	Chloroplast stroma				√
	GO:0010319	Stromule				√
	GO:0031967	Organelle envelope				√
	GO:0031975	Envelope				√
Biological process	GO:0006082	Organic acid metabolic process	√	√			√
	GO:0006520	Cellular amino acid metabolic process	√	√			√
	GO:0006544	Glycine metabolic process	√	√			√
	GO:0006546	Glycine catabolic process	√	√			√
	GO:0006807	Nitrogen compound metabolic process	√	√		√	√
	GO:0008152	Metabolic process	√	√	√	√	√
	GO:0009056	Catabolic process	√	√			√
	GO:0009063	Cellular amino acid catabolic process	√	√			√
	GO:0009069	Serine family amino acid metabolic process	√	√			√
	GO:0009071	Serine family amino acid catabolic process	√	√			√
	GO:0009987	Cellular process	√	√	√	√	√
	GO:0016054	Organic acid catabolic process	√	√			√
	GO:0019464	Glycine decarboxylation via glycine cleavage system	√	√			√
	GO:0019752	Carboxylic acid metabolic process	√	√			√
	GO:0043436	Oxoacid metabolic process	√	√			√
	GO:0044237	Cellular metabolic process	√	√	√	√	√
	GO:0044238	Primary metabolic process	√	√		√	√
	GO:0044248	Cellular catabolic process	√	√			√
	GO:0044281	Small molecule metabolic process	√	√	√	√	√
	GO:0044282	Small molecule catabolic process	√	√			√
	GO:0046395	Carboxylic acid catabolic process	√	√			√
	GO:0071704	Organic substance metabolic process	√	√		√	√
	GO:1901564	Organonitrogen compound metabolic process	√	√		√	√
	GO:1901565	Organonitrogen compound catabolic process	√	√			√
	GO:1901575	Organic substance catabolic process	√	√			√
	GO:1901605	Alpha-amino acid metabolic process	√	√			√
	GO:1901606	Alpha-amino acid catabolic process	√	√			√
	GO:0006730	One-carbon metabolic process			√
	GO:0006139	Nucleobase-containing compound metabolic process				√
	GO:0006163	Purine nucleotide metabolic process				√
	GO:0006164	Purine nucleotide biosynthetic process				√
	GO:0006188	IMP biosynthetic process				√
	GO:0006189	De novo IMP biosynthetic process				√
	GO:0006725	Cellular aromatic compound metabolic process				√
	GO:0006753	Nucleoside phosphate metabolic process				√
	GO:0006793	Phosphorus metabolic process				√
	GO:0006796	Phosphate-containing compound metabolic process				√
	GO:0006950	Response to stress				√
	GO:0009058	Biosynthetic process				√
	GO:0009117	Nucleotide metabolic process				√
	GO:0009123	Nucleoside monophosphate metabolic process				√
	GO:0009124	Nucleoside monophosphate biosynthetic process				√
	GO:0009126	Purine nucleoside monophosphate metabolic process				√
	GO:0009127	Purine nucleoside monophosphate biosynthetic process				√
	GO:0009150	Purine ribonucleotide metabolic process				√
	GO:0009152	Purine ribonucleotide biosynthetic process				√
	GO:0009156	Ribonucleoside monophosphate biosynthetic process				√
	GO:0009161	Ribonucleoside monophosphate metabolic process				√
	GO:0009165	Nucleotide biosynthetic process				√
	GO:0009167	Purine ribonucleoside monophosphate metabolic process				√
	GO:0009168	Purine ribonucleoside monophosphate biosynthetic process				√
	GO:0009259	Ribonucleotide metabolic process				√
	GO:0009260	Ribonucleotide biosynthetic process				√
	GO:0009266	Response to temperature stimulus				√
	GO:0009409	Response to cold				√
	GO:0009628	Response to abiotic stimulus				√
	GO:0018130	Heterocycle biosynthetic process				√
	GO:0019438	Aromatic compound biosynthetic process				√
	GO:0019637	Organophosphate metabolic process				√
	GO:0019693	Ribose phosphate metabolic process				√
	GO:0034641	Cellular nitrogen compound metabolic process				√
	GO:0034654	Nucleobase-containing compound biosynthetic process				√
	GO:0044249	Cellular biosynthetic process				√
	GO:0044271	Cellular nitrogen compound biosynthetic process				√
	GO:0046040	IMP metabolic process				√
	GO:0046390	Ribose phosphate biosynthetic process				√
	GO:0046483	Heterocycle metabolic process				√
	GO:0050896	Response to stimulus				√
	GO:0055086	Nucleobase-containing small molecule metabolic process				√
	GO:0072521	Purine-containing compound metabolic process				√
	GO:0072522	Purine-containing compound biosynthetic process				√
	GO:0090407	Organophosphate biosynthetic process				√
	GO:1901135	Carbohydrate derivative metabolic process				√
	GO:1901137	Carbohydrate derivative biosynthetic process				√
	GO:1901293	Nucleoside phosphate biosynthetic process				√
	GO:1901360	Organic cyclic compound metabolic process				√
	GO:1901362	Organic cyclic compound biosynthetic process				√
	GO:1901566	Organonitrogen compound biosynthetic process				√
	GO:1901576	Organic substance biosynthetic process				√
Molecular funtion	GO:0003824	Catalytic activity	√	√	√	√	√
	GO:0004375	Glycine dehydrogenase (decarboxylating) activity	√	√
	GO:0005488	Binding	√	√	√
	GO:0016491	Oxidoreductase activity	√	√
	GO:0016594	Glycine binding	√	√
	GO:0016597	Amino acid binding	√	√
	GO:0016638	Oxidoreductase activity, acting on the CH-NH2 group of donors	√	√
	GO:0016642	Oxidoreductase activity, acting on the CH-NH2 group of donors, disulfide as acceptor	√	√
	GO:0019842	Vitamin binding	√	√
	GO:0030170	Pyridoxal phosphate binding	√	√
	GO:0031406	Carboxylic acid binding	√	√
	GO:0036094	Small molecule binding	√	√	√
	GO:0043167	Ion binding	√	√	√
	GO:0043168	Anion binding	√	√	√
	GO:0043169	Cation binding	√	√
	GO:0043177	Organic acid binding	√	√
	GO:0070279	Vitamin B6 binding	√	√
	GO:0097159	Organic cyclic compound binding	√	√	√
	GO:1901363	Heterocyclic compound binding	√	√	√
	GO:0000166	Nucleotide binding			√
	GO:0004329	Formate-tetrahydrofolate ligase activity			√
	GO:0005524	ATP binding			√
	GO:0016874	Ligase activity			√
	GO:0016879	Ligase activity, forming carbon-nitrogen bonds			√
	GO:0017076	Purine nucleotide binding			√
	GO:0030554	Adenyl nucleotide binding			√
	GO:0032553	Ribonucleotide binding			√
	GO:0032555	Purine ribonucleotide binding			√
	GO:0032559	Adenyl ribonucleotide binding			√
	GO:0035639	Purine ribonucleoside triphosphate binding			√
	GO:0097367	Carbohydrate derivative binding			√
	GO:1901265	Nucleoside phosphate binding			√
	GO:0003937	IMP cyclohydrolase activity				√
	GO:0004643	Phosphoribosylaminoimidazolecarboxamide formyltransferase activity				√
	GO:0016740	Transferase activity				√	√
	GO:0016741	Transferase activity, transferring one-carbon groups				√	√
	GO:0016742	Hydroxymethyl-, formyl- and related transferase activity				√	√
	GO:0016787	Hydrolase activity				√
	GO:0016810	Hydrolase activity, acting on carbon-nitrogen (but not peptide) bonds				√
	GO:0016814	Hydrolase activity, acting on carbon-nitrogen (but not peptide) bonds, in cyclic amidines				√
	GO:0019238	Cyclohydrolase activity				√
	GO:0004047	Aminomethyltransferase activity					√
	GO:0008483	Transaminase activity					√
	GO:0016769	Transferase activity, transferring nitrogenous groups					√
