# Supplementary material for: Rice Serine Hydroxymethyltransferases: Evolution, Subcellular Localization, Function and Perspectives
Source: Plants (Basel). 2024 Apr 16;13(8):1116. doi: 10.3390/plants13081116 (PMC11053755; doi:10.3390/plants13081116)
Supplement: Supplementary file 1 [file plants-13-01116-s001.zip › Table S8.xlsx]

## Sheet: Sheet1
Table S8 Interface residues of OsSHMT3 dimers
OsSHMT3 with OsSHMT2				OsSHMT3 with OsSHMT3				OsSHMT3 with OsSHMT4				OsSHMT3 with OsSHMT5
Receptor Amino Acid	Ligand Amino Acid	Hydrogen Bond Lehgth		Receptor Amino Acid	Ligand Amino Acid	Hydrogen Bond Lehgth		Receptor Amino Acid	Ligand Amino Acid	Hydrogen Bond Lehgth		Receptor Amino Acid	Ligand Amino Acid	Hydrogen Bond Lehgth
60A	313A	4.013		60A	373A	3.721		71A	73A	4.955		60A	432A	4.678
61A	313A	4.471		61A	373A	4.134		72A	73A	4.532		60A	433A	3.84
61A	314A	4.135		61A	374A	4.022		72A	75A	3.102		60A	436A	3.051
61A	317A	3.57		61A	377A	3.492		79A	68A	3.724		61A	433A	4.377
61A	396A	3.495		61A	456A	3.414		80A	70A	4.009		61A	436A	3.672
61A	399A	3.513		61A	459A	4.247		80A	73A	4.771		61A	437A	3.903
61A	400A	3.851		61A	460A	4.826		82A	68A	3.878		61A	440A	3.586
61A	401A	4.139		62A	368A	4.891		83A	68A	2.895		61A	519A	3.686
62A	310A	3.218		62A	370A	3.231		83A	69A	3.208		61A	522A	4.54
62A	313A	4.548		62A	371A	4.513		83A	70A	2.377		61A	523A	4.605
64A	397A	3.883		62A	373A	4.964		84A	70A	3.063		62A	433A	3.533
64A	398A	4.163		63A	518A	3.649		86A	67A	4.515		64A	520A	3.721
64A	399A	4.037		64A	457A	3.254		86A	68A	2.954		64A	521A	4.808
64A	458A	4.309		64A	458A	3.829		86A	69A	3.629		64A	581A	3.565
64A	459A	4.038		64A	459A	3.568		87A	69A	4.853		64A	582A	3.598
64A	460A	3.995		64A	518A	2.673		87A	70A	2.747		64A	583A	3.451
67A	42A	3.706		64A	519A	3.853		87A	71A	4.593		67A	160A	4.041
67A	43A	4.408		64A	520A	3.535		90A	69A	3.726		67A	161A	4.804
67A	44A	3.22		65A	518A	2.805		103A	71A	4.928		67A	162A	3.245
67A	247A	3.145		67A	102A	3.606		104A	71A	3.956		67A	365A	3.15
67A	305A	2.935		67A	103A	4.186		105A	71A	3.603		67A	428A	3.462
67A	397A	3.378		67A	104A	3.425		105A	72A	1.983		67A	520A	3.236
67A	460A	3.251		67A	307A	3.134		108A	69A	3.625		67A	583A	3.539
68A	43A	4.603		67A	365A	2.894		108A	70A	4.786		68A	162A	3.925
68A	44A	3.605		67A	457A	3.333		108A	71A	1.578		68A	163A	2.978
68A	45A	2.962		67A	520A	3.313		108A	76A	3.206		68A	583A	3.437
68A	460A	3.679		68A	103A	4.74		111A	76A	3.667		68A	584A	2.904
68A	461A	2.933		68A	104A	3.724		111A	78A	4.7		68A	585A	4.991
69A	45A	3.78		68A	105A	2.965		112A	76A	2.803		69A	163A	3.821
69A	459A	3.21		68A	520A	3.831		151A	128A	4.435		69A	582A	3.049
69A	460A	4.4		68A	521A	2.979		151A	132A	3.879		69A	583A	4.279
69A	461A	4.795		69A	105A	3.603		153A	131A	4.201		69A	584A	4.805
69A	462A	4.572		69A	519A	3.116		164A	79A	4.588		69A	585A	3.268
69A	463A	4.084		69A	520A	4.286		164A	81A	2.491		69A	586A	3.609
70A	45A	3.68		69A	521A	4.714		165A	80A	4.7		70A	162A	4.981
70A	46A	3.35		69A	522A	4.58		165A	81A	3.047		70A	163A	3.661
70A	49A	4.991		69A	523A	4.571		167A	83A	4.009		70A	164A	3.454
71A	45A	4.021		70A	105A	3.576		168A	81A	3.446		70A	167A	4.647
71A	46A	4.456		70A	106A	3.472		168A	83A	4.583		71A	164A	3.775
71A	49A	3.466		71A	105A	4.003		171A	83A	3.582		71A	167A	3.783
72A	46A	3.655		71A	106A	4.182		171A	84A	3.539		72A	164A	3.546
72A	49A	2.913		71A	109A	3.512		171A	86A	3.186		72A	167A	3.039
72A	50A	3.93		72A	105A	4.628		174A	83A	3.85		72A	168A	3.835
72A	301A	3.419		72A	106A	3.42		175A	86A	2.574		72A	424A	3.869
73A	49A	4.552		72A	109A	2.933		195A	83A	4.535		75A	164A	3.665
75A	46A	3.595		72A	110A	3.552		196A	83A	3.052		75A	424A	4.308
75A	304A	2.871		72A	361A	3.647		208A	83A	3.149		75A	427A	3.262
75A	305A	4.85		73A	109A	4.904		209A	83A	3.496		76A	203A	2.678
76A	85A	2.628		75A	106A	3.625		210A	83A	2.501		76A	423A	4.399
76A	300A	3.823		75A	364A	3.486		212A	85A	4.38		76A	424A	3.202
76A	301A	3.356		75A	365A	4.311		213A	84A	4.176		76A	427A	2.858
76A	304A	3.37		76A	145A	2.726		213A	85A	2.564		78A	199A	4.986
78A	81A	3.572		76A	360A	4.074		213A	86A	2.958		78A	203A	2.763
78A	85A	2.688		76A	361A	3.661		213A	87A	4.82		78A	427A	2.541
79A	50A	4.617		76A	364A	2.579		238A	114A	4.911		79A	199A	3.379
79A	81A	4.46		77A	364A	3.943		259A	117A	4.978		79A	203A	3.436
79A	85A	3.3		78A	141A	3.774		259A	121A	4.539		79A	420A	4.193
79A	297A	3.911		78A	145A	2.678		263A	117A	3.707		79A	423A	3.952
79A	300A	3.716		78A	364A	2.544		267A	114A	3.019		79A	424A	3.979
79A	301A	3.759		79A	138A	3.493		289A	125A	4.816		82A	173A	4.852
80A	49A	3.989		79A	141A	4.712		290A	132A	4.366		82A	192A	4.26
82A	74A	3.04		79A	145A	4.448		293A	124A	2.609		82A	195A	3.866
82A	77A	3.348		79A	357A	3.935		293A	125A	1.796		82A	196A	3.662
82A	78A	3.752		79A	360A	4.778		293A	128A	3.264		82A	199A	4.419
82A	81A	3.857		79A	361A	3.498		293A	132A	4.493		83A	171A	3.986
83A	53A	4.063		80A	109A	3.063		294A	121A	2.833		83A	173A	3.84
83A	54A	4.957		82A	134A	4.408		294A	124A	4.489		83A	196A	4.668
83A	55A	3.807		82A	137A	3.415		294A	125A	2.69		83A	420A	4.861
83A	74A	4.994		82A	138A	3.546		310A	78A	3.575		85A	192A	3.672
83A	78A	4.558		82A	141A	4.648		310A	80A	3.716		86A	173A	3.427
85A	74A	3.666		83A	113A	3.657		317A	124A	3.34		86A	176A	3.857
85A	77A	2.671		83A	114A	4.235		322A	120A	2.526		86A	189A	4.071
86A	55A	3.747		83A	115A	3.492		322A	124A	2.537		86A	192A	3.547
86A	58A	3.819		85A	134A	3.564		323A	120A	3.19		86A	193A	4.093
86A	71A	4.416		85A	137A	2.641		324A	120A	4.265		87A	172A	3.525
86A	74A	2.829		86A	115A	3.948		333A	124A	4.933		89A	176A	3.583
86A	75A	3.898		86A	118A	3.609		347A	84A	4.374		89A	189A	2.884
87A	54A	3.926		86A	131A	4.777		347A	86A	4.133		89A	192A	3.588
89A	58A	3.304		86A	134A	2.849		352A	79A	4.461		90A	172A	2.935
89A	71A	3.437		86A	135A	3.755		355A	79A	4.545		90A	173A	4.23
89A	73A	4.049		87A	114A	3.883		512A	10A	4.713		90A	175A	2.892
89A	74A	4.86		89A	118A	3.295		520A	71A	4.198		90A	176A	4.588
90A	54A	3.037		89A	131A	3.421		521A	70A	4.938		95A	176A	4.431
90A	55A	4.513		89A	132A	4.955		521A	71A	0.694		97A	176A	3.2
90A	57A	3.029		89A	133A	4.783		521A	72A	4.19		97A	177A	4.106
90A	58A	3.852		89A	134A	4.769		522A	70A	3.951		97A	187A	3.447
95A	58A	3.011		90A	114A	2.881		522A	71A	2.459		97A	188A	3.549
97A	58A	3.371		90A	115A	4.275		522A	72A	4.169		99A	177A	2.887
97A	59A	4.586		90A	117A	2.885		523A	72A	3.388		99A	187A	3.428
97A	69A	3.588		90A	118A	3.842		526A	72A	4.349		100A	175A	3.1
97A	70A	4.092		95A	118A	2.505						100A	176A	2.602
99A	59A	2.887		95A	130A	4.882						100A	177A	2.548
100A	57A	3.175		95A	131A	4.795						100A	188A	4.872
100A	58A	2.636		97A	118A	3.576						101A	175A	3.085
100A	59A	2.482		97A	119A	3.917						102A	125A	3.614
101A	56A	4.848		97A	129A	3.913						102A	175A	3.322
101A	57A	3.525		99A	119A	2.896						103A	125A	4.495
102A	7A	4.031		100A	117A	2.998						103A	126A	4.565
102A	57A	3.447		100A	118A	3.06						103A	174A	3.776
103A	7A	4.473		100A	119A	2.551						103A	175A	2.783
103A	8A	4.605		101A	116A	4.967						104A	125A	3.501
103A	56A	3.508		101A	117A	3.624						104A	126A	3.623
103A	57A	2.852		102A	67A	3.851						105A	126A	2.93
104A	7A	3.67		102A	117A	3.45						105A	127A	3.306
104A	8A	3.588		103A	67A	4.376						105A	128A	3.692
105A	8A	2.957		103A	68A	4.725						105A	129A	4.327
105A	9A	3.385		103A	116A	4.578						106A	128A	3.72
105A	10A	3.896		103A	117A	2.832						106A	129A	4.553
105A	11A	4.233		104A	67A	3.287						106A	130A	3.579
106A	10A	3.659		104A	68A	3.61						106A	133A	3.814
106A	11A	4.206		105A	68A	3.054						108A	170A	2.942
106A	12A	3.728		105A	69A	3.404						108A	171A	4.398
106A	15A	3.858		105A	70A	3.625						108A	172A	3.235
108A	52A	3.245		105A	71A	4.006						109A	129A	3.554
108A	53A	3.311		106A	70A	3.26						109A	130A	2.879
108A	54A	3.249		106A	71A	4.753						109A	131A	4.71
108A	56A	4.314		106A	72A	3.482						110A	130A	3.868
108A	57A	4.145		106A	75A	3.816						110A	137A	4.637
109A	11A	3.533		107A	72A	4.941						111A	166A	4.823
109A	12A	2.886		108A	112A	3.286						111A	169A	3.26
109A	13A	4.283		108A	113A	3.235						111A	170A	4.289
109A	20A	4.283		108A	114A	3.349						111A	171A	4.734
109A	23A	4.625		108A	116A	4.962						111A	174A	3.881
110A	12A	4.053		109A	70A	4.956						111A	417A	3.447
110A	23A	4.07		109A	71A	3.389						111A	418A	4.459
111A	51A	3.131		109A	72A	2.897						112A	166A	3.294
111A	52A	4.24		109A	73A	4.438						112A	169A	4.385
111A	53A	4.282		109A	80A	3.586						112A	170A	3.642
111A	56A	3.947		110A	72A	4.341						113A	141A	3.364
111A	294A	3.669		111A	111A	3.284						113A	166A	3.484
112A	48A	3.221		111A	112A	4.497						114A	141A	3.675
112A	51A	4.293		111A	116A	4.957						114A	145A	4.696
112A	52A	3.472		111A	354A	3.563						114A	148A	2.762
113A	23A	3.926		112A	108A	3.242						114A	166A	3.935
113A	48A	3.492		112A	111A	4.118						114A	585A	3.501
114A	26A	4.729		112A	112A	3.516						115A	141A	3.62
114A	27A	3.877		113A	83A	3.998						115A	144A	4.151
114A	30A	2.908		113A	108A	3.569						115A	148A	4.43
114A	48A	3.385		113A	111A	4.346						115A	368A	4.997
114A	461A	4.119		114A	83A	4.239						116A	166A	3.489
114A	462A	3.405		114A	86A	4.444						116A	169A	3.732
115A	23A	3.75		114A	87A	3.806						116A	361A	4.987
115A	26A	3.636		114A	90A	2.768						116A	367A	4.486
115A	30A	4.307		114A	108A	3.536						116A	368A	3.062
116A	41A	4.797		114A	521A	4.535						117A	148A	3.039
116A	43A	3.736		114A	522A	3.493						117A	158A	3.359
116A	48A	4.286		115A	83A	3.476						117A	159A	3.381
116A	51A	3.848		115A	86A	4.124						117A	160A	3.721
116A	249A	4.367		115A	90A	4.365						117A	161A	3.007
116A	250A	2.801		116A	103A	3.868						118A	144A	3.846
117A	30A	2.846		116A	108A	4.221						118A	147A	3.385
117A	40A	3.193		116A	111A	4.252						118A	148A	4.631
117A	41A	3.48		116A	309A	4.468						118A	153A	3.703
117A	42A	3.496		116A	310A	3.437						118A	155A	3.241
117A	43A	3.09		117A	90A	2.788						118A	158A	2.671
117A	48A	4.251		117A	100A	3.587						118A	368A	2.809
117A	250A	3.112		117A	101A	3.577						118A	493A	4.539
117A	462A	4.784		117A	102A	3.664						119A	155A	4.231
118A	26A	3.507		117A	103A	3.2						119A	157A	3.016
118A	29A	3.484		117A	108A	4.231						119A	158A	2.642
118A	30A	4.383		117A	310A	4.726						119A	359A	4.149
118A	35A	2.617		118A	86A	3.902						119A	361A	3.206
118A	37A	3.508		118A	89A	3.519						119A	362A	2.81
118A	40A	3.121		118A	90A	4.419						119A	368A	4.065
118A	250A	3.118		118A	95A	2.612						120A	368A	4.951
118A	370A	4.046		118A	97A	3.84						121A	252A	4.468
119A	37A	4.659		118A	100A	2.91						127A	484A	4.638
119A	39A	2.981		118A	310A	3.514						127A	496A	3.102
119A	40A	2.586		118A	430A	3.085						128A	484A	3.642
119A	241A	4.282		119A	97A	4.942						128A	495A	3.378
119A	243A	3.075		119A	99A	3.096						128A	496A	3.598
119A	244A	2.852		119A	100A	2.724						128A	505A	4.363
119A	250A	3.249		119A	301A	4.391						129A	155A	3.47
120A	250A	4.927		119A	303A	3.093						129A	157A	3.461
121A	134A	4.091		119A	304A	2.968						129A	158A	4.995
128A	361A	3.863		119A	310A	3.599						129A	484A	4.681
128A	372A	4.98		121A	194A	3.73						129A	494A	3.719
128A	373A	2.619		128A	421A	3.991						129A	495A	3.354
129A	37A	3.356		128A	433A	2.589						129A	496A	4.755
129A	39A	4.552		129A	97A	3.48						129A	512A	2.762
129A	361A	4.79		129A	99A	4.973						130A	155A	3.385
129A	371A	4.739		129A	421A	4.586						130A	484A	4.459
129A	372A	3.836		129A	431A	4.922						130A	488A	4.444
129A	373A	4.491		129A	432A	3.739						130A	493A	3.462
129A	389A	2.886		129A	433A	4.578						130A	494A	2.759
130A	37A	4.336		129A	449A	4.801						130A	495A	4.653
130A	361A	4.932		130A	97A	4.637						131A	144A	4.293
130A	365A	3.023		130A	425A	3.015						131A	147A	2.891
130A	370A	3.518		130A	430A	3.965						131A	488A	3.782
130A	371A	4.839		130A	431A	4.721						131A	493A	3.393
131A	29A	3.507		131A	89A	3.17						132A	158A	4.981
131A	365A	2.784		131A	425A	2.72						133A	143A	4.473
131A	370A	3.576		131A	430A	4.296						133A	146A	2.863
132A	29A	4.968		132A	425A	4.877						133A	147A	3.341
133A	29A	3.194		133A	85A	4.834						133A	491A	4.867
134A	22A	4.436		133A	89A	2.945						134A	140A	3.211
134A	25A	3.481		134A	82A	3.231						134A	141A	4.954
134A	26A	3.092		134A	83A	4.981						134A	143A	3.626
134A	29A	3.895		134A	85A	3.332						134A	144A	3.729
135A	26A	3.566		134A	86A	3.401						135A	144A	4.29
137A	22A	3.45		134A	89A	4.355						137A	140A	3.34
137A	25A	2.688		135A	86A	3.464						137A	143A	2.69
138A	19A	4.942		137A	82A	3.311						138A	140A	3.712
138A	22A	3.661		137A	85A	2.699						141A	136A	4.281
138A	23A	4.704		138A	79A	3.868						141A	137A	3.637
141A	18A	4.819		138A	82A	3.595						141A	140A	3.523
141A	19A	4.533		141A	78A	3.638						145A	134A	2.653
141A	22A	4.711		141A	79A	4.065						145A	136A	2.807
145A	16A	2.774		141A	82A	4.028						145A	137A	3.522
145A	18A	4.157		145A	76A	2.716						164A	222A	3.581
145A	19A	3.45		145A	78A	2.769						164A	223A	3.517
164A	104A	3.496		145A	79A	4.54						164A	225A	4.969
164A	105A	3.303		164A	164A	3.699						164A	226A	4.75
164A	108A	3.621		164A	165A	2.657						164A	415A	2.851
164A	292A	3.124		164A	167A	4.941						165A	222A	3.018
165A	104A	3.452		164A	168A	3.714						165A	413A	4.243
165A	290A	4.681		164A	352A	3.098						165A	415A	3.803
165A	292A	2.763		165A	164A	2.908						167A	409A	4.835
167A	287A	2.965		165A	349A	4.659						167A	410A	2.437
167A	288A	2.408		165A	350A	4.707						167A	411A	3.618
167A	289A	3.735		165A	352A	4.163						167A	412A	3.78
168A	104A	3.671		167A	347A	2.857						168A	222A	3.534
168A	287A	4.663		167A	348A	2.572						168A	410A	4.156
171A	111A	3.37		167A	349A	3.256						168A	411A	4.664
171A	153A	4.013		168A	164A	3.745						171A	229A	3.289
174A	153A	4.69		168A	347A	4.508						171A	271A	3.24
175A	152A	4.211		171A	171A	3.527						171A	410A	4.39
175A	153A	3.228		171A	213A	4.488						175A	271A	3.133
180A	121A	3.842		171A	347A	4.058						180A	270A	3.483
180A	152A	2.996		174A	213A	4.394						180A	271A	3.781
180A	153A	3.714		175A	209A	4.851						181A	238A	4.069
181A	120A	3.69		175A	212A	3.439						181A	239A	4.919
181A	121A	2.698		175A	213A	2.881						194A	179A	3.889
194A	61A	4.34		178A	213A	3.896						195A	179A	4.952
194A	288A	4.073		179A	213A	4.768						195A	407A	3.266
195A	284A	3.477		180A	181A	3.184						195A	408A	3.973
195A	285A	3.574		180A	212A	3.345						195A	411A	4.859
196A	287A	4.774		180A	213A	3.67						205A	404A	3.698
196A	288A	4.491		181A	180A	4.82						206A	404A	4.611
205A	281A	3.631		181A	181A	2.916						207A	404A	3.076
207A	281A	3.487		194A	121A	4.119						207A	408A	3.668
207A	285A	3.882		194A	348A	4.466						207A	409A	3.462
207A	286A	2.762		195A	344A	3.467						208A	408A	4.231
208A	285A	4.803		195A	345A	3.232						208A	409A	3.635
208A	286A	3.78		196A	347A	4.866						209A	409A	2.798
209A	115A	4.938		196A	348A	4.644						209A	410A	4.335
209A	286A	2.9		205A	341A	3.511						210A	409A	4.621
209A	287A	3.483		206A	341A	4.557						212A	238A	3.433
210A	286A	4.876		207A	341A	3.289						213A	229A	4.125
212A	115A	3.512		207A	345A	3.445						213A	232A	4.687
212A	120A	2.778		207A	346A	3.678						213A	233A	2.983
212A	286A	4.322		208A	345A	4.529						213A	236A	4.225
213A	111A	4.181		208A	346A	3.661						213A	238A	3.856
213A	114A	4.352		209A	346A	2.809						213A	271A	3.618
213A	115A	3.172		209A	347A	3.474						213A	272A	3.973
213A	118A	4.318		210A	346A	4.878						214A	271A	4.308
213A	119A	4.894		212A	179A	4.141						301A	177A	4.385
213A	120A	3.765		212A	180A	2.991						303A	174A	4.747
213A	153A	3.537		212A	346A	3.513						303A	175A	4.959
213A	154A	2.856		213A	171A	4.202						303A	177A	3.244
214A	153A	2.595		213A	174A	4.632						304A	177A	2.682
301A	59A	4.682		213A	175A	3.168						307A	119A	4.896
303A	59A	3.128		213A	178A	4.121						307A	125A	3.056
304A	59A	2.68		213A	180A	3.539						309A	174A	4.732
307A	1A	4.445		213A	213A	3.457						310A	173A	4.982
307A	7A	3.25		213A	214A	2.659						310A	174A	2.791
309A	56A	4.317		214A	213A	3.114						310A	175A	3.077
310A	56A	2.843		301A	119A	4.742						310A	176A	2.798
310A	57A	3.293		303A	119A	3.199						310A	177A	3.297
310A	58A	2.948		304A	119A	2.718						310A	178A	4.725
310A	59A	3.194		307A	62A	4.086						310A	413A	3.675
310A	290A	4.37		307A	67A	3.092						310A	414A	2.809
310A	291A	4.304		309A	116A	4.256						310A	415A	3.549
310A	292A	2.872		310A	115A	4.722						310A	416A	4.493
310A	294A	4.427		310A	116A	2.911						310A	417A	4.855
311A	292A	4.574		310A	117A	3.433						311A	415A	4.908
341A	145A	3.329		310A	118A	2.923						341A	263A	3.564
341A	146A	4.467		310A	119A	3.151						341A	264A	4.818
341A	147A	3.274		310A	120A	4.988						341A	265A	3.37
344A	135A	4.033		310A	350A	4.312						344A	253A	4.751
345A	135A	3.687		310A	351A	3.937						345A	253A	3.838
345A	147A	3.664		310A	352A	3.208						345A	265A	3.372
345A	148A	4.534		310A	354A	4.462						345A	266A	3.949
346A	147A	2.503		311A	352A	4.75						345A	267A	4.582
346A	148A	3.671		341A	205A	3.576						346A	265A	3.651
346A	149A	2.736		341A	207A	3.635						346A	266A	3.82
346A	150A	4.87		344A	195A	4.357						346A	267A	2.657
347A	107A	3.306		345A	195A	3.774						346A	268A	4.463
347A	108A	4.626		345A	207A	4.425						347A	225A	2.906
347A	136A	4.977		345A	208A	4.57						347A	226A	4.496
347A	149A	3.636		346A	207A	3.154						347A	267A	4.755
348A	107A	3.542		346A	208A	3.526						347A	271A	3.75
348A	108A	4.91		346A	209A	2.69						348A	225A	2.648
349A	107A	3.094		346A	210A	4.818						348A	252A	4.595
349A	134A	4.983		346A	212A	4.155						348A	253A	4.476
350A	105A	4.787		347A	167A	2.906						349A	225A	3.218
350A	250A	4.577		347A	168A	4.402						350A	368A	2.686
351A	250A	4.139		347A	171A	4.435						351A	368A	3.148
352A	104A	3.133		347A	209A	3.33						352A	222A	3.159
352A	105A	2.716		348A	167A	3.486						352A	223A	2.733
352A	250A	3.059		348A	168A	4.896						352A	368A	3.427
352A	251A	4.655		349A	165A	4.893						352A	369A	4.274
352A	295A	3.254		349A	167A	2.856						352A	418A	3.395
354A	51A	3.886		349A	194A	4.895						353A	368A	4.19
354A	250A	4.58		350A	165A	4.982						354A	169A	3.589
354A	295A	4.991		350A	310A	2.803						354A	368A	3.57
355A	292A	3.565		351A	310A	2.911						354A	418A	3.82
355A	294A	4.248		352A	164A	3.238						355A	415A	3.666
355A	295A	2.906		352A	165A	4.133						355A	418A	2.61
357A	19A	4.559		352A	310A	2.895						357A	137A	3.904
357A	23A	3.959		352A	311A	4.523						360A	134A	4.394
360A	16A	4.57		352A	355A	3.526						360A	137A	4.003
360A	19A	3.917		354A	111A	3.821						361A	130A	3.408
361A	12A	3.296		354A	310A	4.067						361A	134A	3.466
361A	16A	4.628		354A	355A	4.09						361A	137A	3.756
361A	19A	3.819		355A	352A	3.385						364A	133A	3.344
364A	15A	4.114		355A	355A	2.997						364A	134A	2.653
364A	16A	3.138		357A	79A	4.443						364A	135A	4.011
365A	7A	3.371		360A	76A	4.665						364A	136A	2.654
365A	15A	4.244		360A	79A	4.803						365A	125A	2.738
370A	2A	3.056		361A	72A	3.557						365A	126A	4.908
371A	2A	4.596		361A	76A	3.541						369A	118A	4.085
373A	1A	4.468		361A	79A	3.507						370A	118A	3.789
374A	1A	3.839		364A	75A	2.954						370A	119A	3.861
377A	1A	3.913		364A	76A	2.602						370A	120A	4.108
421A	68A	3.739		364A	77A	4.21						373A	118A	3.035
421A	69A	4.158		364A	78A	4.565						373A	119A	3.329
425A	69A	4.505		365A	67A	2.848						374A	119A	4.332
425A	70A	3.196		365A	68A	4.928						377A	119A	4.982
425A	71A	4.175		370A	62A	4.123						421A	185A	4.133
430A	70A	3.96		371A	62A	4.808						421A	186A	3.617
430A	71A	3.596		373A	60A	4.135						421A	187A	3.091
431A	69A	3.601		373A	61A	4.497						421A	188A	3.057
431A	70A	4.128		374A	61A	4.09						424A	188A	4.194
432A	68A	4.971		377A	61A	3.743						425A	188A	3.547
432A	69A	3.567		421A	128A	4.502						425A	189A	2.81
433A	68A	2.635		421A	129A	4.914						425A	190A	4.296
433A	69A	4.511		425A	129A	4.736						425A	191A	4.732
456A	1A	3.534		425A	130A	3.212						429A	188A	3.331
457A	1A	4.522		425A	131A	3.826						430A	176A	3.362
457A	4A	3.512		430A	118A	4.796						430A	188A	2.96
457A	7A	3.445		430A	130A	4.254						430A	189A	3.62
458A	4A	3.821		430A	131A	3.744						431A	187A	4.031
459A	1A	4.502		431A	129A	4.08						431A	188A	2.683
459A	4A	4.048		431A	130A	4.75						432A	186A	3.418
460A	1A	4.986		432A	129A	4.291						432A	187A	3.516
518A	3A	2.912		433A	128A	2.616						432A	188A	4.757
518A	4A	3.048		433A	129A	4.225						433A	185A	2.624
518A	5A	2.829		456A	61A	3.652						433A	186A	3.401
519A	4A	3.646		457A	64A	3.273						433A	187A	3.955
520A	4A	3.417		457A	67A	3.428						442A	186A	4.102
520A	7A	3.452		458A	64A	4.075						449A	187A	4.004
520A	8A	3.736		459A	61A	3.145						456A	119A	2.918
520A	9A	4.88		459A	64A	4.075						457A	119A	3.318
521A	8A	3.082		460A	61A	3.696						457A	122A	3.509
521A	9A	4.901		461A	61A	4.615						457A	125A	3.409
522A	9A	4.33		518A	63A	3.893						458A	119A	4.958
522A	54A	3.533		518A	64A	2.852						458A	122A	3.452
522A	57A	4.276		518A	65A	2.891						459A	119A	2.981
523A	9A	3.733		518A	69A	4.275						459A	122A	4.028
				519A	64A	4.023						460A	119A	4.292
				519A	69A	3.357						518A	122A	3.345
				519A	117A	4.739						518A	123A	2.729
				520A	64A	3.679						519A	122A	3.844
				520A	67A	3.549						519A	127A	3.245
				520A	68A	3.688						520A	122A	4.018
				520A	69A	4.324						520A	125A	3.324
				520A	117A	4.868						520A	126A	3.79
				521A	68A	3.01						520A	127A	3.773
				521A	69A	4.483						520A	172A	4.819
				521A	114A	4.528						521A	126A	2.888
				522A	69A	3.581						521A	127A	4.289
				522A	114A	3.287						521A	172A	2.672
				522A	117A	4.519						522A	127A	4.769
				523A	69A	3.822						522A	172A	3.408
