# Supplementary material for: Rice Serine Hydroxymethyltransferases: Evolution, Subcellular Localization, Function and Perspectives
Source: Plants (Basel). 2024 Apr 16;13(8):1116. doi: 10.3390/plants13081116 (PMC11053755; doi:10.3390/plants13081116)
Supplement: Supplementary file 1 [file plants-13-01116-s001.zip › Table S9.xlsx]

## Sheet: Sheet1
Table S9 Primers used in this study.
Primer Name	Sequence (5'-3')
pAN580-OsSHMT1-GFP-SpeI-F	GCCCAGATCAACTAGTATGGCCATGGCGACGGCG
pAN580-OsSHMT1-GFP-XbaI-R	TCGAGACGTCTCTAGAGTTCTTGTACTTCATGGTTTCTTTCTCA
pAN580-OsSHMT2-GFP-SpeI-F	GCCCAGATCAACTAGTATGGACTCCGTCGCGTCGTG
pAN580-OsSHMT2-GFP-XbaI-R	TCGAGACGTCTCTAGACTCCTTGTACTTCATGCTGT
pAN580-OsSHMT3-GFP-SpeI-F	GCCCAGATCAACTAGTATGGCGATGGCTTCGCAC
pAN580-OsSHMT3-GFP-XbaI-R	TCGAGACGTCTCTAGA ATCCTTGTACTTCATG
pAN580-OsSHMT4-GFP-SpeI-F	GCCCAGATCAACTAGTATGGATCTCTCGCGGCCGGA
pAN580-OsSHMT4-GFP-XbaI-R	TCGAGACGTCTCTAGATACATCAAAACCTGGCATTG
pAN580-OsSHMT5-GFP-SpeI-F	GCCCAGATCAACTAGTATGCTCGATCGCGCGACG
pAN580-OsSHMT5-GFP-XbaI-R	TCGAGACGTCTCTAGA TACATCAAATCCCGGCAT
AD-OsSHMT1-EcoRI-F	GGAGGCCAGTGAATTCATGGCCATGGCGACGGCG
AD-OsSHMT1-BamHI-R	CGAGCTCGATGGATCCTTAGTTCTTGTACTTCATGGTTTCTTTCTCA
AD-OsSHMT2-EcoRI-F	GGAGGCCAGTGAATTCATGGACTCCGTCGCGTCGTG
AD-OsSHMT2-BamHI-R	CGAGCTCGATGGATCCCTACTCCTTGTACTTCATGCTGT
AD-OsSHMT3-EcoRI-F	GGAGGCCAGTGAATTCATGGCGATGGCTTCGCACCACCTCGCCCAGCC
AD-OsSHMT3-BamHI-R	CGAGCTCGATGGATCCCTAATCCTTGTACTTCATGTCGGATACCCTGA
AD-OsSHMT4-EcoRI-F	GGAGGCCAGTGAATTCATGGATCTCTCGCGGCCGG
AD-OsSHMT4-BamHI-R	CGAGCTCGATGGATCCTCATACATCAAAACCTGGCA
AD-OsSHMT5-EcoRI-F	GGAGGCCAGTGAATTCATGCTCGATCGCGCGACGGGGGGGCGGCGCCG
AD-OsSHMT5-BamHI-R	CGAGCTCGATGGATCCTTATACATCAAATCCCGGCATGGCAAATTGTAA
BD-OsSHMT1-EcoRI-F	CATGGAGGCCGAATTCATGGCCATGGCGACGGCG
BD-OsSHMT1-BamHI-R	GCAGGTCGACGGATCCTTAGTTCTTGTACTTCATG
BD-OsSHMT2-EcoRI-F	CATGGAGGCCGAATTCATGGACTCCGTCGCGTCGTG
BD-OsSHMT2-BamHI-R	GCAGGTCGACGGATCCCTACTCCTTGTACTTCATGCTGT
BD-OsSHMT3-EcoRI-F	CATGGAGGCCGAATTCATGGCGATGGCTTCGCAC
BD-OsSHMT3-BamHI-R	GCAGGTCGACGGATCCCTAATCCTTGTACTTCAT
BD-OsSHMT4-EcoRI-F	CATGGAGGCCGAATTCATGGATCTCTCGCGGCCGG
BD-OsSHMT4-BamHI-R	GCAGGTCGACGGATCCTCATACATCAAAACCTGGCA
BD-OsSHMT5-EcoRI-F	CATGGAGGCCGAATTCATGCTCGATCGCGCGACG
BD-OsSHMT5-BamHI-R	GCAGGTCGACGGATCCTTATACATCAAATCCCGG
